1 **Gain-of-function genetic screen of the kinome reveals BRSK2 as an inhibitor of the NRF2**  
2 **transcription factor**

3 Tigist Y Tamir<sup>1</sup>, Brittany M Bowman<sup>2</sup>, Megan J Agajanian<sup>1</sup>, Dennis Goldfarb<sup>5, 6</sup>, Travis P  
4 Schrank<sup>2</sup>, Trent Stohrer<sup>2, 3</sup>, Andrew E Hale<sup>4</sup>, Priscila F Siesser<sup>2</sup>, Seth J Weir<sup>2</sup>, Ryan M Murphy<sup>1</sup>,  
5 Kyle M LaPak<sup>5</sup>, Bernard E Weissman<sup>2,7</sup>, Nathaniel J Moorman<sup>2, 4</sup>, M. Ben Major<sup>1, 2, 5, 8\*</sup>

6 <sup>1</sup>Department of Pharmacology, University of North Carolina at Chapel Hill, Chapel Hill, NC

7 <sup>2</sup>Lineberger Comprehensive Cancer Center, University of North Carolina, Chapel Hill, NC

8 <sup>3</sup>Department of Computer Science, University of North Carolina at Chapel Hill, Chapel Hill, NC

9 <sup>4</sup>Department of Microbiology and Immunology, University of North Carolina at Chapel Hill  
10 School of Medicine, Chapel Hill, NC

11 <sup>5</sup>Department of Cell Biology and Physiology, Washington University in St. Louis, St. Louis, MO

12 <sup>6</sup>Institute for Informatics, School of Medicine, Washington University in St. Louis, St. Louis, MO

13 <sup>7</sup>Department of Pathology and Laboratory Medicine, University of North Carolina at Chapel Hill,  
14 Chapel Hill, NC

15 <sup>8</sup>Department of Otolaryngology, School of Medicine, Washington University in St. Louis, St.  
16 Louis, MO

17

18 *\*Correspondence to: M. Ben Major, PhD, Washington University in St. Louis, 660 Euclid Ave.*  
19 *Avenue Box 8228, St. Louis, MO 63110. Email: [bmajor@wustl.edu](mailto:bmajor@wustl.edu)*

20

21 **Summary Statement:** BRSK2 suppresses NRF2 signaling by inhibiting protein synthesis  
22 through mTOR downregulation.

23

24 **Key Words:** NRF2, oxidative stress response, phosphoproteomics, functional genomics,  
25 kinase, BRSK2, BRSK1, AMPK, mTOR.

26

27 **Abstract**

28 NFE2L2/NRF2 is a transcription factor and master regulator of cellular antioxidant response.  
29 Aberrantly high NRF2-dependent transcription is recurrent in human cancer, and conversely  
30 NRF2 protein levels as well as activity is diminished with age and in neurodegenerative disorders.  
31 Though NRF2 activating drugs are clinically beneficial, NRF2 inhibitors do not yet exist. Here we  
32 used a gain-of-function genetic screen of the kinome to identify new druggable regulators of NRF2  
33 signaling. We found that the understudied protein kinase Brain Specific Kinase 2 (BRSK2) and  
34 the related BRSK1 kinases suppress NRF2-dependent transcription and NRF2 protein levels in  
35 an activity-dependent manner. Integrated phosphoproteomics and RNAseq studies revealed that  
36 BRSK2 drives AMPK activation and suppresses mTOR signaling. As a result, BRSK2 kinase  
37 activation suppressed ribosome-RNA complexes, global protein synthesis, and NRF2 protein  
38 levels. Collectively, our data establish the catalytically active BRSK2 kinase as a negative  
39 regulator of NRF2 via the AMPK/mTOR signaling. This signaling axis may prove useful for  
40 therapeutically targeting NRF2 in human diseases.

41

## 42 Introduction

43 The transcription factor nuclear factor erythroid 2-related factor 2 (NFE2L2, hereafter referred to  
44 as NRF2) is central to the cellular response to oxidative and electrophilic stress (Itoh et al., 2010;  
45 Suzuki and Yamamoto, 2015). When active, NRF2 provides strong cytoprotective functions by  
46 upregulating expression of: 1) xenobiotic metabolism enzymes, 2) phase II detoxification  
47 enzymes, 3) drug efflux pumps, and 4) the thioredoxin and glutathione antioxidant systems (Itoh  
48 et al., 2010; Kensler et al., 2007). Under homeostatic conditions, the E3 ubiquitin ligase adaptor  
49 kelch like ECH-associated protein 1 (KEAP1) binds ETGE and DLG motifs within NRF2 to  
50 promote NRF2 ubiquitylation and proteasomal degradation (Cullinan et al., 2004; Itoh et al., 1999;  
51 Tong et al., 2006). Electrophilic attack of reactive cysteines within KEAP1 during oxidative stress  
52 suppresses KEAP1-dependent ubiquitylation/degradation of NRF2, resulting in NRF2  
53 stabilization, nuclear translocation, and transcriptional activation of genes containing Antioxidant  
54 Response Elements (AREs)(Baird et al., 2013; Ichikawa et al., 2009; Kensler et al., 2007; Suzuki  
55 et al., 2019). Though KEAP1/CUL3 are prominent NRF2 regulators in most tissues and disease  
56 models, data describing additional mechanisms are still emerging.

57 As a key regulator of metabolism and redox-balance, it is not surprising that alterations in NRF2  
58 contribute to numerous human diseases. NRF2 expression and transcriptional activity declines  
59 with age and is decreased in several neurodegenerative diseases (Cuadrado et al., 2018; Tsakiri  
60 et al., 2019; Zhang et al., 2015). Conversely, NRF2 transcriptional activity is constitutively active  
61 in many cancers, including those of the lung, head/neck, kidney, liver, and bladder cancer  
62 (Menegon et al., 2016; Rojo de la Vega et al., 2018). Multiple mechanisms promote NRF2  
63 activation in cancer: activating mutations in NRF2, inactivating mutations in KEAP1, NRF2 copy  
64 number amplifications, the over-expression of KEAP1 binding proteins which competitively  
65 displace NRF2, and various post-translational modifications to KEAP1 and NRF2(Cloer et al.,  
66 2019; Rojo de la Vega et al., 2018). High NRF2 activity promotes tumor growth, metastasis, and  
67 chemo-/radiation-resistance (Homma et al., 2009; Tao et al., 2014). Patients with mutations in  
68 KEAP1 or NRF2 leading to NRF2 stabilization have poor survival and are comparatively resistant  
69 to many commonly used cytotoxic cancer therapies(Homma et al., 2009; Satoh et al., 2013; Tao  
70 et al., 2014). While there are numerous small molecule activators of NRF2 signaling, there are no  
71 approved NRF2 inhibitors (Cuadrado et al., 2018).

72 Here, we performed a gain-of-function (GOF) screen of human kinases to identify new regulators  
73 of NRF2-dependent transcription. We focused on kinases given their exceptional druggability and  
74 because a rigorous, comprehensive annotation of the kinome for NRF2 activity is lacking. Our  
75 previous phosphoproteomic analysis of KEAP1 and NRF2 shows both proteins are  
76 phosphorylated at multiple sites. The majority of these phosphorylation events are not linked to  
77 specific kinases and are of unknown functional importance (Tamir et al., 2016). That said, recent  
78 studies have revealed a few kinases that influence NRF2 protein stability, subcellular localization  
79 and transcriptional activity. NRF2 is directly phosphorylated by GSK3 $\beta$ , resulting in NRF2  
80 ubiquitylation by  $\beta$ TrCP and subsequent proteasomal degradation (Chowdhry et al., 2012;  
81 Cuadrado, 2015). PKC and AMPK mediated phosphorylation of NRF2, at S40 and S550,  
82 respectively, leads to increased NRF2 stability and signaling (Huang, 2002; Joo et al., 2016).  
83 NRF2 is reported to be a substrate of several MAPKs (e.g. JNK, p38, ERK1/2, ASK1, and TAK1),  
84 however the functional relevance of MAPK-directed phosphorylation is uncertain (Naidu et al.,  
85 2009; Shen et al., 2004; Sun et al., 2009). Activation of the PERK kinase during the unfolded  
86 protein response (UPR) leads to increased NRF2 nuclear accumulation and cell survival (Cullinan  
87 et al., 2003; Del Vecchio et al., 2014). The casein kinase 2 and TAK1 kinases phosphorylate  
88 NRF2 to induce NRF2 nuclear localization (Apopa et al., 2008; Shen et al., 2004). There is also  
89 evidence that activation of the PI3K/AKT/PKB pathway and PIM kinase signaling induces NRF2-  
90 activity and cellular protection (Lim et al., 2008; Nakaso et al., 2003; Warfel et al., 2016).

91 Phosphorylation of KEAP1 or its interacting partners also induces NRF2 stability and signaling.  
92 For example, a recent study reports that phosphorylation of KEAP1 by MST1/2 on  
93 T51/S53/S55/S80 reduces NRF2 ubiquitylation (Wang et al., 2019). Additionally, proteins  
94 containing ETGE-like motifs, such as p62/SQSTM1, bind to KEAP1 and stabilize NRF2 upon  
95 phosphorylation by upstream kinases (e.g. mTORC1, TAK1) (Hashimoto et al., 2016; Ichimura et  
96 al., 2013; Lau et al., 2010). Overall, these findings suggest a wide array of kinase-directed  
97 signaling inputs for NRF2.

98  
99 Our GOF kinome screen revealed that Brain Specific Kinase 2 and 1 (BRSK2/1, also known as  
100 SAD-A and SAD-B, respectively) as negative regulators of NRF2. The BRSKs are understudied  
101 members of the AMPK-related family of kinases (Bright et al., 2008). Both BRSK2/1 contain an N-  
102 terminal kinase domain, followed by a Ubiquitin associated domain (UBA), a Proline rich region  
103 (PRR), and a kinase associated domain (KA1) with an auto-inhibitory sequence (AIS) at the C-  
104 terminus (Wang et al., 2018; Wu et al., 2015). These kinases are known to function downstream  
105 of Liver Kinase B1 (LKB1) signaling, but are also activated by PAK1, CAMKII, and PKA (Bright et  
106 al., 2008; Lizcano et al., 2004; Nie et al., 2012). In various model organisms and mammals,  
107 BRSK2 and BRSK1 are expressed the most in the brain. BRSK2 is also expressed in pancreas;  
108 BRSK1 is expressed in gonads as well as endocrine tissues (Uhlen et al., 2015; Uhlen et al.,  
109 2010). In *C. elegans*, the *BRSK2/1* homologue *SAD-1* is required for neuron polarization and  
110 synaptic vesicle transport (Kim et al., 2010; Morrison et al., 2018). In mouse neurons, *Brsk2/1*  
111 promote formation of vesicles, neurite differentiation, and synapse formation (Kishi, 2005; Lilley  
112 et al., 2014). In pancreatic islets, BRSK2 promotes insulin secretion in response to glucose  
113 stimulation (Chen et al., 2012; Nie et al., 2018; Nie et al., 2012). To date BRSK2/1 have been  
114 implicated in positive regulation of cell cycle progression, ER associated protein degradation  
115 (ERAD), neuronal polarity, autophagy, and insulin signaling (Li et al., 2012; Muller et al., 2010;  
116 Wang et al., 2012; Wang et al., 2013). Specifically, BRSK2 kinase activity is induced by starvation  
117 to inhibit mTOR and promote autophagy, similarly to AMPK, and new evidence suggests BRSK2  
118 leads to activation of PI3K/AKT signaling (Bakula et al., 2017; Chen et al., 2012; Saiyin, 2017).  
119 While BRSK2 is not yet directly linked to NRF2 signaling, several studies show that BRSK2 is  
120 protective during ER stress (Wang et al., 2012; Wang et al., 2013). Here we identified BRSK2 as  
121 a novel repressor of NRF2 signaling, and mechanistically establish that BRSK2 activates AMPK,  
122 suppresses mTOR and decreases protein translation.

123

## 124 Results

### 125 Kinome gain of function screen identifies regulators of NRF2 activity

126 To identify kinase regulators of NRF2 signaling, we employed a gain-of-function arrayed screen  
127 where 385 kinases and kinase associated proteins were over-expressed in HEK293T cells. NRF2  
128 transcriptional activity was quantified with the hQR41-Firefly luciferase reporter normalized to  
129 constitutively expressed *Renilla* luciferase. The hQR41 reporter contains a NRF2-responsive  
130 fragment of the human *NQO1* promoter, which is a consensus NRF2 target gene across species  
131 and tissue types. Over-expression of the positive controls NRF2 and DPP3 activated hQR41-  
132 luciferase, whereas KEAP1 expression suppressed the reporter activity (Hast et al., 2013).  
133 Kinases that activated hQR41 include MAP3K8, MOS, MAP3K7/TAK1, and MAP2K6; while  
134 HIPK4, BRD3, and BRSK2 were identified as repressors of NRF2-mediated transcription (Fig.  
135 1A). Hits from this primary screen were validated in focused reporter assays across multiple cell  
136 lines, including HEK293Ts, MEFs and H2228 lung adenocarcinoma cells (Fig. 1B-E). Several of  
137 the validated kinases are confirmed in recent reports. MAP3K7/TAK1 activates NRF2 via  
138 phosphorylation of p62/SQSTM1 to drive degradation of KEAP1 (Hashimoto et al., 2016). Though  
139 BRD3 has not been directly tested, other members of the BRD family of proteins negatively



140 regulate NRF2-mediated transcription (Hussong et al., 2014; Michaeloudes et al., 2014).  
141 Similarly, the HIPK4-related protein HIPK2 is a direct transcriptional target of NRF2 and a positive  
142 regulator of NRF2 cytoprotection (Torrente et al., 2017). Because of its novelty within the NRF2  
143 pathway, we sought to better understand BRSK2 and its role in NRF2 signaling.

#### 144 **BRSK2 and BRSK1 repress NRF2 signaling.**

145 Redox regulation of cysteines within KEAP1 controls KEAP1-catalyzed NRF2 ubiquitylation and  
146 degradation. Through reactivity with cysteine 151 in KEAP1, the triterpenoid of oleanolic acid (OA)  
147 derivative CDDO-methyl (CDDO-me) potently suppresses NRF2 degradation (Suzuki et al.,  
148 2019). We first tested whether BRSK2 over-expression suppressed CDDO-me driven NRF2  
149 activation, as quantified by hQR41-luciferase expression in HEK293T cells. We compared murine  
150 *Brsk2* and two human BRSK2 splice variants, where BRSK2-Isoform4 is missing 20 amino acids  
151 compared to BRSK2-Isoform3. KEAP1 and Musculoaponeurotic Factor G (MAFG) served as  
152 positive controls for NRF2 inhibitors. Compared to the negative controls (hcRED and  
153 Glucuronidase Beta (pGUS)), all BRSK2 variants suppressed NRF2 transcriptional activity under  
154 both vehicle and CDDO-me treated conditions (Fig. 2A). Similarly, murine *Brsk2* blocked NRF2-  
155 transcriptional activation. To confirm BRSK2 as an inhibitor of endogenous NRF2, we quantified  
156 endogenous NRF2 target gene expression by qRT-PCR. Following over-expression of controls  
157 or BRSK2 variants in HEK293T cells, we measured changes in NRF2 target genes *HMOX1*,  
158 *GCLM*, and *SLC7A11* normalized to *GAPDH*. BRSK2 variants downregulated NRF2 targets  
159 similar to MAFG in both vehicle and CDDO-me treated conditions (Fig. 2B-D). Since key  
160 regulation of NRF2 is post-translational, we tested whether BRSK2 over-expression impacted  
161 steady state NRF2 protein levels. Compared to controls, BRSK2 over-expression decreased  
162 NRF2 protein levels in HEK293T cells (Fig. 2E, compare lanes 5–7 with 1 and 2). To further  
163 explore a role for KEAP1 in mediating BRSK2-suppression of NRF2, we tested if BRSK2 over-  
164 expression could block a constitutively active mutant of NRF2 that does not bind KEAP1 (NRF2  
165  $\Delta$ ETGE). BRSK2 repressed both wild type NRF2 and NRF2  $\Delta$ ETGE (Fig. 2F).

166 BRSK1 is a paralog to BRSK2, sharing ~68% amino acid sequence similarity and having similar  
167 signaling functions. Leveraging the hQR41 reporter assay in HEK293T cells, we over-expressed  
168 human or mouse BRSK1, BRSK2 or both. Like BRSK2, BRSK1 expression suppressed NRF2-  
169 dependent transcriptional activation (Fig. 2G). We also performed the hQR41 reporter assay in  
170 *Keap1*<sup>-/-</sup> MEFs, which express high levels of NRF2 (Fig. 2H). Again, both BRSK1 and BRSK2  
171 inhibited NRF2-driven transcription, suggesting that the mechanism of suppression was  
172 independent of KEAP1-mediated ubiquitylation. Finally, we evaluated the impact of BRSK1 and  
173 BRSK2 on a panel of pathway specific transcriptional reporters in HEK293T cells (Fig. 2I). BRSK1  
174 and BRSK2 suppressed NRF2 and retinoic acid receptor (RAR) and activated the Activator  
175 Protein-1 (AP1), Activating Transcription Factor 3 (ATF3), and Transforming Growth Factor  $\beta$   
176 (TGF $\beta$ ) reporters. Neither BRSK family member regulated the WNT/ $\beta$ -catenin reporter, NF $\kappa$ B  
177 reporter or STAT reporter. As such, BRSK1 and BRSK2 have redundant and conserved functions  
178 in NRF2 suppression, and do not impact all signaling pathways equally.

179 Finally, we evaluated the effect of BRSK2 silencing on NRF2 protein expression and NRF2-driven  
180 transcription. HEK293T cells were engineered to express dead KRAB-dCas9 nuclease before  
181 stable introduction of 4 scrambled control sgRNAs or 5 independent BRSK2-specific sgRNAs.  
182 W.blot analysis of the resulting cell lines confirmed efficient sgRNA-mediated CRISPRi silencing  
183 of BRSK2 protein and no effect on NRF2 protein levels (Fig. S1A). NRF2 hQR41 reporter assays  
184 in these cells did not show a BRSK2-silencing phenotype on NRF2 activity. Since *BRSK2* RNA  
185 levels are highest in brain and pancreas, we evaluated BRSK2 expression in pancreatic cancer  
186 cell lines (Fig. S1C). Two cell lines, PANC1 and MIA PaCa-2, expressed the most BRSK2, of  
187 which we used MIA PaCa-2 for CRISPRi silencing. Like HEK293T cells, MIA PaCa-2 cells

188 deficient for BRSK2 expressed comparable levels of NRF2 as control cells (Fig. S1D). These data  
189 suggest that under homeostatic conditions, endogenous levels of BRSK2 does not control NRF2  
190 activity. Further experiments in *BRSK2* null background as opposed to silenced background are  
191 needed.

### 192 **BRSK2 kinase function is required to suppress NRF2 signaling.**

193 We next determined whether BRSK2-mediated inhibition of NRF2 required BRSK2 kinase activity.  
194 We mutated K48 and D141 in the kinase domain of BRSK2; these residues are required for ATP  
195 binding and substrate phosphorylation (Lizcano et al., 2004). We also mutated T174, which is  
196 phosphorylated by LKB1 to activate members of the AMPK kinase family (Fig. 3A) (Lizcano et al.,  
197 2004). Compared to controls, over-expression of wild type BRSK2 decreased NRF2-dependent  
198 hQR41 luciferase expression whereas kinase dead variants had no significant affect (Fig. 3B).  
199 The kinase dependency of BRSK2 was further confirmed using qRT-PCR of endogenous NRF2  
200 target gene *HMOX1*, which was repressed by wild type BRSK2, but not by the kinase dead  
201 mutants (Fig. 3C). qRT-PCR for the *NRF2* transcript showed that expression of neither wild type  
202 nor kinase dead BRSK2 mutants affected NRF2 mRNA levels (Fig. 3D). Finally, we evaluated  
203 NRF2 protein levels in HEK293T cells over-expressing BRSK2 or the kinase dead mutants. As  
204 expected, NRF2 protein levels were decreased by over-expression of wild type, but not kinase  
205 dead BRSK2 (Fig. 3E). Similarly, kinase dead mutants of BRSK1 did not impact NRF2 signaling  
206 (Fig. 3F).

207 Beyond kinase activity, structure-function studies of BRSK2 and the AMPK-like family of kinases  
208 have revealed numerous features of functional importance (Bright et al., 2009; Wu et al., 2015).  
209 We created a series of point mutations and truncations to determine which domains within BRSK2  
210 are important for NRF2 suppression. Binding of the regulatory UBA and AIS region of the KA1  
211 domain to the catalytic fold of the kinase domain is thought to hold BRSK2 in an inactive state  
212 until phosphorylated by upstream regulators, bound by interaction partners or recruited to the  
213 plasma membrane (Wu et al., 2015). As such, mutations in residues of the UBA domain and loss  
214 of the AIS or KA1 domain results in an active BRSK2 kinase. We created and expressed mutant  
215 proteins in HEK293T cells followed by hQR41 reporter quantitation and NRF2 W.blot analysis  
216 (Fig. 3G-J). The L309D and  $\Delta$ YFLLL mutations within the UBA domain did not suppress the  
217 hQR41 reporter and NRF2 or its target genes in W.blot analysis (Fig.3G and 3H, respectively).  
218 Based on previous reports on the role of the BRSK2 UBA domain, it is likely that loss of YFLLL  
219 motif increases auto-inhibition by the AIS/KA1 region (Wu et al., 2015). Mutations of UBA residues  
220 that contact the kinase domain, M332K and Y334F, repressed NRF2 activity. We next deleted  
221 the kinase domain ( $\Delta$ N), C-terminus ( $\Delta$ C), PRR ( $\Delta$ PRR), AIS ( $\Delta$ AIS), or KA1 ( $\Delta$ KA1) domain and  
222 evaluated their effect on NRF2-mediated transcription via reporter assays (Fig. 3I). Compared to  
223 controls, BRSK2  $\Delta$ KA1 and  $\Delta$ AIS inhibited NRF2 activity to similar or more than BRSK2 WT, while  
224 loss of either kinase, C-terminal, or PRR regions abolished regulation of NRF2 signaling (Fig. 3J).

### 225 **BRSK2 does not repress NRF2 via the ubiquitin proteasome system (UPS).**

226 NRF2 is rapidly stabilized by electrophilic compounds that react with cysteines in KEAP1. NRF2  
227 protein levels also accumulate within minutes of chemical inactivation of the ubiquitin proteasome  
228 system (UPS). We tested whether BRSK2 expression would suppress NRF2 stabilized by KEAP1  
229 reactive electrophiles or inhibitors of the UPS. First, we treated HEK293T cells with vehicle,  
230 Sulforaphane, or tBHQ for 6 hours after 24 hours of BRSK2 expression. Like CDDO-me, these  
231 compounds modify cysteine residues on KEAP1 to stabilize NRF2 (Suzuki et al., 2019). Cells  
232 over-expressing BRSK2 significantly downregulated NRF2 protein levels compared to the  
233 corresponding control (Fig. 4A, quantification below). Second, we tested the proteasomal  
234 inhibitors MG132 and Bortezomib as well as the CUL3 neddylation inhibitor MLN4924. NRF2  
235 protein levels were decreased by BRSK2 in all treatment groups compared to the control,

236 although to varying degrees (Fig. 4B, quantification below). Lastly, we asked whether BRSK2-  
237 mediated downregulation of NRF2 involved the autophagy pathway. To evaluate this, we treated  
238 BRSK2 overexpressing HEK293T cells with vehicle or Bafilomycin A (BafA1) for 12 hours.  
239 Compared to vehicle, BafA1 treatment did not significantly affect NRF2 in either control or BRSK2  
240 over-expressing conditions (Fig. 4C, quantified below). LC3B conversion confirmed efficacy of  
241 BafA1 treatment. These data suggest that BRSK2-mediated downregulation of NRF2 is not via  
242 the UPS or autophagy.

### 243 **RNAseq and phosphoproteomic characterization BRSK2 and BRSK1 expression.**

244 Unbiased comprehensive screening and molecular annotation has improved significantly over the  
245 past decade, with newly empowered informatics that distill the resulting large datasets into  
246 pathways and biological processes. To better understand BRSK2/1 function in cells, and to  
247 possibly reveal how BRSK2 suppresses NRF2, we performed RNAseq and global quantitative  
248 phosphoproteomic analysis on HEK293T cells expressing BRSK2 and BRSK1 as compared to  
249 mock transfected or hcRED expression. Hierarchical clustering analysis revealed genes altered  
250 by BRSK2/1 over-expression, where genes that passed FDR (FDR < 5%) and fold change (FC ≥  
251 2) cutoff are highlighted (Fig. 5A and B). Compared to control, we observed 723 and 879  
252 differentially expressed genes that pass FDR < 5% for BRSK2 and BRSK1, respectively. Based  
253 on fold change, differential gene expression due to BRSK2 expression was more robust than  
254 BRSK1. Gene set enrichment analysis (GSEA) using the Hallmark and Oncogenic gene sets in  
255 MSigDB revealed statistically significantly altered signaling pathways (Table S5 – S8). Genes  
256 associated with mTOR signaling were robustly downregulated in BRSK2/1 expressing cells (Fig.  
257 5C). GSEA for several NRF2 gene signatures revealed downregulation by BRSK2 (Fig. S2, Table  
258 S9). Close examination by pathway analysis of the downregulated genes revealed enrichment for  
259 those involved in pyruvate, glutathione, and amino acid metabolism. Interestingly, several of the  
260 genes are known players in ferroptosis, a non-canonical and iron dependent cell death pathway  
261 (Table S9).

262 Independently of the RNAseq analyses, we performed tandem mass tags (TMT)-based  
263 quantitative phosphoproteomics on BRSK2/1 expressing cells where we used hcRED as control.  
264 Biological triplicate samples were analyzed, revealing ~10,000 phosphosites in ~8,400 phospho-  
265 peptides. Following the RNAseq trend, BRSK2 impacted phospho-proteome more robustly than  
266 did BRSK1. Compared to control, at FDR < 5%, BRSK2 over-expression induced 307 differentially  
267 phosphorylated peptides compared to 189 observed in BRSK1 over-expression (Table S10). We  
268 leveraged PTMSigDB and enrichment analysis to map the observed phospho-peptide changes  
269 to annotated signaling pathways (Fig. 5D and E) (Krug et al., 2019). BRSK2/1 positively regulated  
270 AMPK and AKT signaling, while negatively impacting the mTOR pathway. BRSK2 also  
271 suppressed signaling through the CDK1, CDK2, and CDC7 pathways (Table S12).

272 To confirm activation of AMPK signaling, BRSK2 was expressed in HEK293T cells before W.blot  
273 analysis for phosphorylation of AMPK substrates (LxRxx(pS/pT)). We expressed either wild type  
274 (WT), kinase active ( $\Delta$ KA1 or  $\Delta$ AIS), or kinase dead (K48A or D141N) BRSK2 for 24 hours. Over-  
275 expression of wild type and kinase active BRSK2 (lane 2, 5, & 6) upregulated pS/T AMPK motif  
276 compared to control and kinase dead BRSK2 (lane 1, 3, & 4) (Fig 6A). We then measured  
277 changes in mTOR substrate phosphorylation by evaluating p-S6K T389, p-4EBP1 T37/46, and p-  
278 4EBP1 S65 in cells expressing hcRED control, BRSK2, kinase dead BRSK2 (K48A), or BRSK1.  
279 BRSK2/1 expression decreased phosphorylation of both S6K and 4EBP1 (Fig. 6B). Total protein  
280 levels of 4EBP1 increased following BRSK2/1 expression. Together, these data suggest that  
281 BRSK2/1 downregulates mTOR signaling while upregulating AMPK substrate phosphorylation.

282 Finally, because BRSK2/1 over-expression suppressed mTOR, we quantified the rate of protein  
283 translation after BRSK2/1 expression (Fig. 6C). HEK293T cells expressing BRSK2/1 or control

284 hcRED were pulsed with <sup>35</sup>S-Methionine before lysis and quantitation of nascent polypeptides,  
285 where Cyclohexamide (CHX) served as a negative control. Compared to control and kinase dead  
286 BRSK2, expression of wild type BRSK2 and BRSK1 downregulated protein translation by 40%  
287 and 10%, respectively (Fig. 6C). To further confirm decreased translation, we measured ribosome  
288 binding to mRNA in cells expressing BRSK2/1. Cells transfected with the indicated construct were  
289 fractionated in a 10% - 50% sucrose gradient followed by absorbance measurement for  
290 polyribosome tracing. Compared to control and kinase dead BRSK2, over-expression of wild type  
291 BRSK2 decreased heavy polyribosome formation on mRNA (Fig. 6D).

292

## 293 Discussion

294 The NRF2 transcription factor is central to a growing number of human pathologies. The  
295 transcriptional program it governs enables life in the presence of oxygen, electrophiles, and  
296 environmental stressors. As such, aberrant activation or suppression of NRF2 contributes to and  
297 causes a number of human diseases, including cancer, inflammation, diabetes, and  
298 neurodegeneration. Though its relevance and centrality to human health is well-established, we  
299 have yet to realize the full potential of NRF2-directed therapeutics. In this study, we focused on  
300 kinase regulators of NRF2 because the kinome is exceptionally druggable and the mechanistic  
301 impact of NRF2 phosphorylation remains elusive. We discovered that, in an activity-dependent  
302 manner, the BRSK2 kinase suppresses NRF2 signaling. We show that BRSK2 induces AMPK  
303 activity and inhibits mTOR, resulting in decreased ribosome loading on mRNAs which  
304 downregulates protein synthesis.

305 Beyond revealing the BRSK kinases as indirect suppressors of NRF2 translation, this work has  
306 several implications. Signaling through the mTOR pathway has been reported to both promote  
307 and inhibit NRF2 in a context dependent manner (Aramburu et al., 2014). Our data argue that  
308 mTOR suppression by BRSK2, irrespective of cell type or duration, results in NRF2 protein loss.  
309 Specifically, BRSK2 over-expression suppresses NRF2 protein at basal and electrophilic induced  
310 conditions. Though NRF2 suppression was greatest after 24 hours of BRSK2 expression, through  
311 an unknown mechanism, BRSK2 over-expression for greater than 36 hours resulted in cell death  
312 (not shown). While we connect BRSK2 to NRF2 through activation of AMPK and suppression of  
313 mTOR, it is possible that additional mechanisms contribute to the phenotype. For example, it  
314 remains to be determined if BRSK2/1 bind or directly phosphorylate KEAP1 or NRF2. Our  
315 immunoprecipitation and mass spectrometry experiments for KEAP1, NRF2, BRSK1 and BRSK2  
316 did not reveal a co-complex, but false-negatives are common in pull-down mass spectrometry  
317 experiments, particularly for kinase-substrate interactions.

318 The small molecule NRF2 inhibitors halofuginone and brusatol offer further support for a requisite  
319 role of protein synthesis as a key point of NRF2 regulation (Harder et al., 2017; Tsuchida et al.,  
320 2017). Both halofuginone and brusatol are noted as potent NRF2 inhibitors that sensitize cells to  
321 chemotherapy. Halofuginone inhibits prolyl-tRNA synthetase while brusatol acts on peptidyl  
322 transferase to suppress protein translation and ultimately decrease proteins with short half-life  
323 like NRF2, a phenotype observed with over-expression of BRSK2 (Harder et al., 2017; Tsuchida  
324 et al., 2017). This also highlights the underlying role of stress signaling in protein synthesis. Under  
325 moderate oxidative stress, mTOR regulated 5' Cap-dependent translation is inhibited, but can be  
326 bypassed via Internal Ribosomal Entry Site (IRES)-mediated translation found in the 5'  
327 untranslated region (5'UTR) (Komar and Hatzoglou, 2011). However, under severe stress  
328 translation is inhibited via localization of ribosome-RNA complexes to stress granules to protect  
329 nascent polypeptides and translation complex from damage. While we have not evaluated  
330 changes in NRF2 mRNA levels associated with polysomes, the NRF2 mRNA does contain an  
331 IRES-like region that promotes de novo translation under oxidative stress (Lee et al., 2017).



332 Conversely, NRF2 loss decreases protein translation rate in pancreatic cancer due to increased  
333 oxidation of proteins in the translational machinery as well as decreased 4EBP1 phosphorylation  
334 (DeNicola et al., 2012). Since BRSK2/1 decreases mTOR activity, possible mechanism of NRF2  
335 depletion may be block of translation initiation/elongation under low oxidative stress where NRF2  
336 mRNA is still dependent on 5'Cap-dependent translation.

337 Gain-of-function screening and extensive validation confirm BRSK2 as a suppressor of NRF2, yet  
338 it is unclear if BRSK2 loss impacts NRF2 or oxidative stress response signaling. In an acute  
339 experiment, we designed and tested a panel of short interfering RNAs against BRSK2, and  
340 observed inconsistent results despite greater than 95% BRSK2 silencing (not shown). Long-term  
341 suppression of BRSK2 expression with stable CRISPRi technology did not impact NRF2 protein  
342 levels. Since kinases are catalytic enzymes, it is likely that our loss-of-function approaches failed  
343 to eliminate enough BRSK2 activity to impact NRF2. Alternatively, it is possible that our  
344 experiments lacked the necessary context, for example the presence of an upstream activating  
345 signal. Further studies are needed in neuronal and pancreatic systems to evaluate BRSK loss  
346 and NRF2 signal transduction.

347 BRSK2 and BRSK1 impact cellular signaling pathways beyond NRF2, AMPK and mTOR, as  
348 gleaned from the RNAseq and phosphoproteomic experiments. BRSK2 expression activated  
349 CHEK1, PKC, and AKT1 among other kinase signaling pathways. In a focused screen of various  
350 engineered transcriptional reporters, we show that BRSK1 and BRSK2 induced AP1 and ATF3  
351 stress response signaling, as well as TGF $\beta$  signaling. It is possible that some of these responses  
352 are coupled indirectly to the suppression of mTOR; further work is needed to determine this.  
353 These data provide a foundational resource to better interrogate signaling regulated by BRSK2/1.

354

## 355 **Material and Methods**

### 356 **Cell Culture**

357 All cell lines were obtained from American Type Culture Collection (ATCC) and were used within  
358 10 passages after receipt from ATCC to ensure their identities. Cells were cultured in a humidified  
359 incubator at 37°C and 5% CO<sub>2</sub>. Cells were passaged with 0.05% Trypsin/0.53mM EDTA in  
360 Sodium Bicarbonate (Corning, 25-052-CI), and maintained in media supplemented with 10% fetal  
361 bovine serum (FBS) as follows: HEK293T, MIA PaCa2– Dulbecco's Modified Eagle Medium  
362 (DMEM) (Corning, 10-013-CV); H2228– RPMI-1640 (Corning, 10-040-CV); and *Keap1* *+/+* and  
363 *Keap1* *-/-* Mouse Embryonic Fibroblasts (MEFs) generated as previously described (Cloer, 2018;  
364 Wakabayashi et al., 2003) – DMEM/Ham's F-12 50/50 mix supplemented with Sodium Pyruvate  
365 and Non-essential amino acids (Corning, 10-092-CV).

### 366 **Generation of CRISPRi Cell lines**

367 Lentivirus for KRAB-dCas9 was generated by using PsPax2 and PMD2G packaging vectors  
368 (Gilbert et al., 2014). HEK293T and MIA PaCa-2 cells were infected with KRAB-dCas9 lentivirus  
369 and monoclonal lines were generated via single cell sorting following 10 $\mu$ g/mL Blasticidin (GIBCO,  
370 A11139-03) selection for 5 passages. Each monoclonal line was cultured in 5 $\mu$ g/mL Blasticidin  
371 following sorting. Single guide RNA (sgRNA) vectors were generated by ligating oligonucleotides  
372 into Aarl (ThermoFisher Scientific, ER1582) digested VDB783 vector (Table S1). Each sgRNA  
373 was lentivirally introduced to the above mentioned cell lines, and cells were cultured for 3  
374 passages in 2.5 $\mu$ g/mL Puromycin (Corning, 61-385-RA) and 5 $\mu$ g/mL Blasticidin before further  
375 analysis. Stable cell lines were maintained in 1 $\mu$ g/mL Puromycin and 5 $\mu$ g/mL Blasticidin.

### 376 **Plasmids and Reagents**

377 The human kinome ORF library in pDONOR223 was obtained from Addgene (Cambridge, MA,  
378 1000000014) and cloned into a custom pHAGE-CMV-FLAG destination vector using Gateway  
379 cloning technology, as previously described (Agajanian et al., 2019). Luciferase reporter plasmids  
380 for WNT (BAR), NF $\kappa$ B, AP-1, ATF3, STAT, Retinoic acid (RAR), and TGF $\beta$  (SMAD) were cloned  
381 into transient expression vectors as previously done (Matthew P. Walker, 2015; Travis L.  
382 Biechele, 2008). The NOTCH (CSL) reporter was a gift from Raphael Kopan (Addgene, 41726)  
383 (Saxena et al., 2001).

384 All ORFs were cloned into pHAGE-CMV-FLAG via LR clonase (Thermo Fisher, 11791-020);  
385 pDONOR223.1 *BRSK2* (splice isoform 3, *BRSK2\_Iso3*) and *Brsk2* were obtained from Harvard  
386 PlasmID repository (HsCD00297097 and MmCD00295042). BRSK2 Kinase dead (K48A, D141N,  
387 and T174A) and UBA domain (L309D, M332K/Y334F, and  $\Delta$ YFLLL) mutants were generated  
388 using Q5 Hot Start Site Direct Mutagenesis kit (New England BioLabs, E0552S). BRSK2 domain  
389 deletion mutations  $\Delta$ N ( $\Delta$  kinase),  $\Delta$ C ( $\Delta$  C-terminal),  $\Delta$ PRR ( $\Delta$  proline-rich region),  $\Delta$ KA1 ( $\Delta$   
390 kinase associated domain), and  $\Delta$ AIS ( $\Delta$  auto-inhibitory sequence) were generated via Phusion  
391 DNA polymerase (New England BioLabs, M0530S), where the PCR product was treated with  
392 DpnI (New England BioLabs, R0176S) then purified with Monarch PCR & DNA Purification Kit  
393 (New England BioLabs, T1030S) followed by T4 DNA Ligase reaction (New England BioLabs,  
394 M0202S). BRSK1 WT and T189A vectors were obtained from MRC PPU Reagents and Services  
395 (DU1236 and DU1242) in a pCMV5-HA backbone. *Brsk1* was obtained from Origene  
396 (MR220008). They were then gateway converted into pDONOR223.1. Cloning primers are listed  
397 in Table S1.

#### 398 **Kinome gain-of-function screen**

399 HEK293T cells were plated in 384-well clear-bottom plates (Corning, 3764), and transfected with  
400 a cocktail of 20ng FLAG-Kinase, 4ng hQR41 (Moehlenkamp and Johnson, 1999) (a generous gift  
401 from Jeffery Johnson, University of Wisconsin), and 1ng HSV-thymidine kinase promoter driven  
402 *Renilla* luciferase (pRL-TK-*Renilla*, referred to as *Renilla*) (Promega, E2241) per well using  
403 Lipofectamine 2000 (Life technologies, 11668-019) in OptiMEM (Gibco, 31985-070). Each kinase  
404 was transfected in four technical replicates and biological triplicate using the Promega Dual-Glo  
405 Luciferase Assay System per the manufacturer's protocol (Promega, E2940) (Agajanian et al.,  
406 2019). NRF2 transcriptional activity was determined by measuring levels of Firefly luciferase and  
407 was normalized to *Renilla* luciferase for well-to-well variability. Fold activation of the reporter was  
408 determined compared to GFP expressing cells, and false discovery rate (FDR) was calculated  
409 following adjustment via Benjamini & Hochberg correction.

#### 410 **Western blot**

411 All samples were lysed in RIPA (10% glycerol, 50mM Tris-HCL, 100mM NaCl, 2mM EDTA, 0.1%  
412 SDS, 1% Nonidet P-40, 0.2% Sodium Deoxycholate) supplemented with protease inhibitor  
413 cocktail (ThermoFisher Scientific, 78429), phosphatase inhibitor cocktail (ThermoFisher  
414 Scientific, 78426), NEM (Thermo Scientific, 23030), and Benzamide (Sigma, E1014). Lysis was  
415 done on ice for 30min and lysates were centrifuged at 4°C for 15min at 21,000xg. Following  
416 normalization of protein concentration via BCA (Pierce, 23225), samples were denatured in  
417 NuPAGE LDS buffer (Invitrogen, NP0007) with 1mM DTT. Samples were treated with the  
418 following small molecules to stabilize NRF2: Sigma-- Bardoxolone Methyl/CDDO-me (S8078),  
419 tert-Butyl hydroquinone/tBHQ (112941), Sulforaphane (S6317); Calbiochem-- MG132 (474790),  
420 MLN4924 (505477001); Selleck Chem-- Bortezomib (PS-341). Antibodies are listed in Table S2.

#### 421 **qRT-PCR and RNA sequencing analysis**



422 RNA was collected using PureLink RNA Mini Kit (Invitrogen, 12183018A) per manufacturer  
423 instruction. The extracted RNA was then reverse transcribed to cDNA using iScript cDNA  
424 Synthesis Kit (BioRad, 170-8891), which was then used to perform quantitative RT-PCR (qRT-  
425 PCR) using SYBR Green (Applied Biosystems, 4385617) for the specified target genes (Table  
426 S3).

427 3µg of RNA was submitted to Novogene Corp. Ltd. (Sacramento, CA) for sequencing using  
428 Illumina HiSeq platform where reads were mapped to reference genome *Homo sapiens*  
429 (GRCh37/hg19). Alignments were done using STAR/HTSeq. Differential expression analysis was  
430 performed starting with gene level read count quantification provided by Novogene Corp.  
431 Preprocessing, normalization, and differential expression analysis were performed according to  
432 the analysis pipeline outlined by Law *et. al.* (Law et al., 2016). Marginally detected genes (<5 total  
433 read counts across samples) were filtered out as an initial preprocessing step, yielding a uni-  
434 modal distribution of read-counts per million by gene. Data normalization was performed by using  
435 the trimmed mean of M-values method as implemented in the calcNormFactors edgeR R-package  
436 function(Chen, 2014). Differential expression analysis was subsequently performed using the  
437 Limma R-packages functions voom and eBayes (Ritchie et al., 2015).

438 Gene set enrichment analysis (GSEA) was performed based on the above described pre-  
439 processed read counts which were converted to counts per million and log2 transformed  
440 (logCPM). From 13,000 genes the top 10,000 differentially expressed genes were used for GSEA  
441 analysis. Genes were ranked according to signal to noise ratio as defined by the Broad Institute  
442 GSEA software using the R-project fgsea package. Test gene sets (Hallmark and Oncogenic  
443 gene sets from Molecular Signatures Database (MSigDB, Broad Institute)) were downloaded from  
444 the MSIG data bank via the msigdb R-project package (Liberzon et al., 2015; Subramanian,  
445 2005). Raw data and processed datasets are available through GEO (GSE139135).

#### 446 **Translation assay and polysome fractionation**

447 Rate of protein translation was measured in HEK293T cells expressing controls or BRSK2/1 24  
448 hours post transfection using radioactive methionine (<sup>35</sup>S-Met) labeling, and polysome  
449 fractionation was performed as previously described (Graves et al., 2019; Lenarcic et al., 2014).

#### 450 **Phosphoproteomics sample processing and data analysis**

451 Protein from HEK293Ts expressing control or BRSK2/1 (1.4mg) was precipitated in acetone  
452 overnight at -20°C. The sample was pelleted and re-suspended in 7M urea, reduced with 5mM  
453 DTT (dithiothreitol) and alkylated with 15mM CAA (chloroacetamide). The sample was adjusted  
454 with 50mM ABC (ammonium bicarbonate) such that the urea concentration is 1M or less. A  
455 standard tryptic digest was performed overnight at 37°C. Solid Phase Extraction (SPE) was then  
456 performed using C18 Prep Sep™ cartridges (Waters, WAT054960), followed by reconstitution in  
457 0.5% TFA (trifluoroacetic acid). The SPE cartridge was washed with conditioning solution (90%  
458 methanol with 0.1% TFA), then equilibrated with 0.1% TFA. The sample was passed slowly  
459 (1drop/sec) through the equilibrated cartridge, then the cartridge was desalted with equilibration  
460 solution. The sample was then slowly eluted (1drop/sec) with an elution solution (50% ACN  
461 (acetonitrile)) with 0.1% TFA. The sample was then TMT labeled according to kit specifications  
462 (ThermoFisher Scientific, 90110), with the exception that labeling was performed for 6hrs instead  
463 of 1hr. Following labeling, another SPE was performed, as stated above. 10% of sample was  
464 saved for whole proteome input, 90% was phosphopeptide enriched using Titansphere Phos-TiO  
465 Kit (GL Sciences, 5010-21312). Before enrichment, samples were reconstituted in 100µL of Buffer  
466 B (75% ACN, 1% TFA, 20% lactic acid – solution B in the kit). The tip was conditioned by  
467 centrifugation with 100µL of Buffer A (80% ACN, 1% TFA), followed by conditioning with Buffer B  
468 (3000xg, 2min). The sample was then loaded onto the tip and centrifuged twice (1000xg, 5min).

469 The tip was then washed with 50 $\mu$ L of Buffer B, followed by 2 washes with 50 $\mu$ L of Buffer A  
470 (1000xg, 2min). Phosphopeptides were eluted with 100 $\mu$ L of elution 1 (20% ACN, 5% NH<sub>4</sub>OH)  
471 then 100 $\mu$ L of elution 2 (20% ACN, 10% NH<sub>4</sub>OH) (1000xg, 5min). Following phosphopeptide  
472 enrichment, both whole proteome input and phosphopeptides were fractionated utilizing a High  
473 pH Reversed-Phase Peptide Fractionation kit (Pierce, 84868), per manufacturers specifications.  
474 A final clean-up step was performed using C18 Spin Columns (Pierce, 89870).

## 475 **Mass Spectrometry, Data Filtering, and Bioinformatics**

476 Mass spectrometry analysis done as follows: peptides were separated via reverse-phase nano-  
477 HPLC using nanoACQUITY UPLC system (Waters Corporation). Peptides were trapped on a 2  
478 cm column (Pepmap 100, 3 $\mu$ M particle size, 100 Å pore size; ThermoFisher Scientific, 164946),  
479 and separated on a 25cm EASYSpray analytical column (75 $\mu$ M ID, 2.0 $\mu$ m C18 particle size, 100  
480 Å pore size; ThermoFisher Scientific, ES802) at 45°C. The mobile phases were 0.1% formic acid  
481 in water (Buffer A) and 0.1% formic acid in ACN (Buffer B). A 180-minute gradient of 2-30% buffer  
482 B was used with a flow rate of 300nl/min. Mass spectral analysis was performed by  
483 an Orbitrap Fusion Lumos mass spectrometer (ThermoFisher Scientific). The ion source  
484 was operated at 2.4kV and the ion transfer tube was set to 275°C. Full MS scans (350-2000 m/z)  
485 were analyzed in the Orbitrap at a resolution of 120,000 and 4e5 AGC target. The MS2 spectra  
486 were collected using a 0.7 m/z isolation width and analyzed by the linear ion trap using 1e4 AGC  
487 target after HCD fragmentation at 30% collision energy with 50ms maximum injection  
488 time. The MS3 scans (100-500 m/z) were acquired in the Orbitrap at a resolution of 50,000 with  
489 a 1e5 AGC, 2 m/z MS2 isolation window, and at 105ms maximum injection time after HCD  
490 fragmentation with a normalized energy of 65%. Precursor ions were selected in 400-2000 m/z  
491 mass range with mass exclusion width of 5 – 18 m/z. Lock mass = 371.10124 m/z (Polysiloxane).

492 MaxQuant (1.6.6.0) search parameters: specific tryptic digestion, up to 2 missed cleavages, a  
493 static carbamidomethyl cysteine modification, variable protein N-term acetylation, and variable  
494 phospho(STY) as well as methionine oxidation using the human UniProtKB/Swiss-Prot sequence  
495 database (Downloaded Feb 1, 2017). MaxQuant data was deposited to PRIDE/Proteome  
496 Xchange (PXD015884) (Vizcaino et al., 2014). MaxQuant output files proteinGroups.txt and  
497 Phospho(STY) sites.txt were converted using in-house script into GCT format. This GCT file was  
498 then rewritten using Morpheus for compatibility with PTM-SEA analysis in R (Krug et al., 2019).  
499

## 500 **Acknowledgements**

501 We would like to thank Drs. Michael J Emanuele and Thomas R Bonacci for valuable scientific  
502 discussion. We thank Drs. Kirsten L Bryant and Channing J Der for providing expertise and  
503 resources to explore mTOR signaling as well as autophagy.

## 504 **Funding sources**

505 TYT and MJA were funded by HHMI Gilliam Fellowship for Advanced Study and the Initiative for  
506 Maximizing Student Diversity Grant (R25-GM055336-16). Additionally, TYT was supported by  
507 NIH T32 Pre-doctoral Training Grants in Pharmacology (T32-GM007040- 42). MJA was also  
508 funded via NIH/NCI NRSA (F31CA228289) and NCI F99/K00 (1F99CA245724-01). RMM was  
509 supported by NIH/NCI NRSA (1F31DE028749-01) and NIH/NIGMS T32 MiBio Training Program  
510 (5T32GM119999-03). BMB, TPS, and KML were funded by ITCMS T32 Training Grant  
511 (T32CA009156). BMB was also supported by NIH/NCI F32 (1F32CA225040-01). This research  
512 was supported by American Cancer Society grant to M. B. Major (RSG-14-1657068-01-TBE),  
513 NIH/NCI to M. B. Major and B. E. Weissman (RO1CA216051) and a NIH consortium grant on  
514 Illuminating the Druggable Genome (U24- DK116204-01).

515

516 **Author Contributions**

517 This work was designed by MBM and TYT. Experiments were carried out by TYT, BMB, MJA,  
518 AEH, PSF, SJW, RMM, and KML. Bioinformatics analysis were performed by DG, TPS, TS, and  
519 TYT. Expertise and resources for evaluating protein translation biology were provided by NJM  
520 and AEH. Manuscript was written by TYT and MBM. Manuscript was reviewed and edited by BMB  
521 and BEW.

522 **Competing interests:** Authors do not have competing interests to declare.

523

## 524 References

- 525 **Agajanian, M. J., Walker, M. P., Axtman, A. D., Ruela-de-Sousa, R. R., Serafin, D. S.,**  
526 **Rabinowitz, A. D., Graham, D. M., Ryan, M. B., Tamir, T., Nakamichi, Y. et al.** (2019). WNT Activates the  
527 AAK1 Kinase to Promote Clathrin-Mediated Endocytosis of LRP6 and Establish a Negative Feedback  
528 Loop. *Cell Rep* **26**, 79-93 e8.
- 529 **Apopa, P. L., He, X. and Ma, Q.** (2008). Phosphorylation of Nrf2 in the transcription activation  
530 domain by casein kinase 2 (CK2) is critical for the nuclear translocation and transcription activation  
531 function of Nrf2 in IMR-32 neuroblastoma cells. *Journal of Biochemical and Molecular Toxicology* **22**, 63-  
532 76.
- 533 **Aramburu, J., Ortells, M. C., Tejedor, S., Buxade, M. and Lopez-Rodriguez, C.** (2014).  
534 Transcriptional regulation of the stress response by mTOR. *Sci Signal* **7**, re2.
- 535 **Baird, L., Llères, D., Swift, S. and Dinkova-Kostova, A. T.** (2013). Regulatory flexibility in the  
536 Nrf2-mediated stress response is conferred by conformational cycling of the Keap1-Nrf2 protein  
537 complex. *Proceedings of the National Academy of Sciences* **110**, 15259-15264.
- 538 **Bakula, D., Muller, A. J., Zuleger, T., Takacs, Z., Franz-Wachtel, M., Thost, A. K., Brigger, D.,**  
539 **Tschan, M. P., Frickey, T., Robenek, H. et al.** (2017). WIPI3 and WIPI4 beta-propellers are scaffolds for  
540 LKB1-AMPK-TSC signalling circuits in the control of autophagy. *Nat Commun* **8**, 15637.
- 541 **Bright, N. J., Carling, D. and Thornton, C.** (2008). Investigating the regulation of brain-specific  
542 kinases 1 and 2 by phosphorylation. *Journal of Biological Chemistry* **283**, 14946-14954.
- 543 **Bright, N. J., Thornton, C. and Carling, D.** (2009). The regulation and function of mammalian  
544 AMPK-related kinases. *Acta Physiol (Oxf)* **196**, 15-26.
- 545 **Chen, X. Y., Gu, X. T., Saiyin, H., Wan, B., Zhang, Y. J., Li, J., Wang, Y. L., Gao, R., Wang, Y. F.,**  
546 **Dong, W. P. et al.** (2012). Brain-selective Kinase 2 (BRSK2) Phosphorylation on PCTAIRE1 Negatively  
547 Regulates Glucose-stimulated Insulin Secretion in Pancreatic  $\beta$ -Cells. *Journal of Biological Chemistry* **287**,  
548 30368-30375.
- 549 **Chen, Y. L., A.T.L.; and Smyth, G.K.** (2014). Differential expression analysis of complex RNA-seq  
550 experiments using edgeR. In: Statistical Analysis of Next Generation Sequence Data, Somnath Datta and  
551 Daniel S Nettleton (eds). *Springer*.
- 552 **Chowdhry, S., Zhang, Y., McMahon, M., Sutherland, C., Cuadrado, A. and Hayes, J. D.** (2012).  
553 Nrf2 is controlled by two distinct  $\beta$ -TrCP recognition motifs in its Neh6 domain, one of which  
554 can be modulated by GSK-3 activity. *Oncogene* **32**, 3765-3781.
- 555 **Cloer, E. W., Goldfarb, D., Schrank, T. P., Weissman, B. E. and Major, M. B.** (2019). NRF2  
556 Activation in Cancer: From DNA to Protein. *Cancer Res* **79**, 889-898.
- 557 **Cloer, E. W. S., P. F.; Cousins, E. M.; Goldfarb, D.; Mowrey, D. D.; Harrison, J. S.; Weir, S. J.;**  
558 **Dokholyan, N. V.; Major, M. B.** (2018). p62-Dependent Phase Separation of Patient-Derived KEAP1  
559 Mutations and NRF2. *Molecular and Cellular Biology*.
- 560 **Cuadrado, A.** (2015). Structural and functional characterization of Nrf2 degradation by glycogen  
561 synthase kinase 3/ $\beta$ -TrCP. *Free Radical Biology and Medicine* **88**, 147-157.
- 562 **Cuadrado, A., Manda, G., Hassan, A., Alcaraz, M. J., Barbas, C., Daiber, A., Ghezzi, P., Leon, R.,**  
563 **Lopez, M. G., Oliva, B. et al.** (2018). Transcription Factor NRF2 as a Therapeutic Target for Chronic  
564 Diseases: A Systems Medicine Approach. *Pharmacol Rev* **70**, 348-383.
- 565 **Cullinan, S. B., Gordan, J. D., Jin, J., Harper, J. W. and Diehl, J. A.** (2004). The Keap1-BTB Protein  
566 Is an Adaptor That Bridges Nrf2 to a Cul3-Based E3 Ligase: Oxidative Stress Sensing by a Cul3-Keap1  
567 Ligase. *Molecular and Cellular Biology* **24**, 8477-8486.
- 568 **Cullinan, S. B., Zhang, D., Hannink, M., Arvisais, E., Kaufman, R. J. and Diehl, J. A.** (2003). Nrf2 is  
569 a direct PERK substrate and effector of PERK-dependent cell survival. *Molecular and Cellular Biology* **23**,  
570 7198-7209.

- 571 **Del Vecchio, C. A., Feng, Y., Sokol, E. S., Tillman, E. J., Sanduja, S., Reinhardt, F. and Gupta, P.**  
572 **B.** (2014). De-Differentiation Confers Multidrug Resistance Via Noncanonical PERK-Nrf2 Signaling. *PLoS*  
573 *Biology* **12**, e1001945.
- 574 **DeNicola, G. M., Karreth, F. A., Humpton, T. J., Gopinathan, A., Wei, C., Frese, K., Mangal, D.,**  
575 **Yu, K. H., Yeo, C. J., Calhoun, E. S. et al.** (2012). Oncogene-induced Nrf2 transcription promotes ROS  
576 detoxification and tumorigenesis. *Nature* **475**, 106-109.
- 577 **Gilbert, L. A., Horlbeck, M. A., Adamson, B., Villalta, J. E., Chen, Y., Whitehead, E. H.,**  
578 **Guimaraes, C., Panning, B., Ploegh, H. L., Bassik, M. C. et al.** (2014). Genome-Scale CRISPR-Mediated  
579 Control of Gene Repression and Activation. *Cell* **159**, 647-61.
- 580 **Graves, P. R., Aponte-Collazo, L. J., Fennell, E. M. J., Graves, A. C., Hale, A. E., Dicheva, N.,**  
581 **Herring, L. E., Gilbert, T. S. K., East, M. P., McDonald, I. M. et al.** (2019). Mitochondrial Protease ClpP is  
582 a Target for the Anticancer Compounds ONC201 and Related Analogues. *ACS Chem Biol* **14**, 1020-1029.
- 583 **Harder, B., Tian, W., La Clair, J. J., Tan, A. C., Ooi, A., Chapman, E. and Zhang, D. D.** (2017).  
584 Brusatol overcomes chemoresistance through inhibition of protein translation. *Mol Carcinog* **56**, 1493-  
585 1500.
- 586 **Hashimoto, K., Simmons, A. N., Kajino-Sakamoto, R., Tsuji, Y. and Ninomiya-Tsuji, J.** (2016).  
587 TAK1 Regulates the Nrf2 Antioxidant System Through Modulating p62/SQSTM1. *Antioxid Redox Signal*  
588 **25**, 953-964.
- 589 **Hast, B. E., Goldfarb, D., Mulvaney, K. M., Hast, M. A., Siesser, P. F., Yan, F., Hayes, D. N. and**  
590 **Major, M. B.** (2013). Proteomic Analysis of Ubiquitin Ligase KEAP1 Reveals Associated Proteins That  
591 Inhibit NRF2 Ubiquitination. *Cancer Research* **73**, 2199-2210.
- 592 **Homma, S., Ishii, Y., Morishima, Y., Yamadori, T., Matsuno, Y., Haraguchi, N., Kikuchi, N.,**  
593 **Satoh, H., Sakamoto, T., Hizawa, N. et al.** (2009). Nrf2 Enhances Cell Proliferation and Resistance to  
594 Anticancer Drugs in Human Lung Cancer. *Clinical Cancer Research* **15**, 3423-3432.
- 595 **Huang, H. C.** (2002). Phosphorylation of Nrf2 at Ser-40 by Protein Kinase C Regulates Antioxidant  
596 Response Element-mediated Transcription. *Journal of Biological Chemistry* **277**, 42769-42774.
- 597 **Hussong, M., rno, S. T. B. o., Kerick, M., Wunderlich, A., Franz, A., Itmann, H. S. u.,**  
598 **Timmermann, B., Lehrach, H., Hirsch-Kauffmann, M. and Schweiger, M. R.** (2014). The bromodomain  
599 protein BRD4 regulates the KEAP1&sol;NRF2-dependent oxidative stress response. *Cell Death and*  
600 *Disease* **5**, e1195-11.
- 601 **Ichikawa, T., Li, J., Meyer, C. J., Janicki, J. S., Hannink, M. and Cui, T.** (2009). Dihydro-CDDO-  
602 trifluoroethyl amide (dh404), a novel Nrf2 activator, suppresses oxidative stress in cardiomyocytes. *PLoS*  
603 *ONE* **4**, e8391.
- 604 **Ichimura, Y., Waguri, S., Sou, Y.-s., Kageyama, S., Hasegawa, J., Ishimura, R., Saito, T., Yang, Y.,**  
605 **Kouno, T., Fukutomi, T. et al.** (2013). Phosphorylation of p62 Activates the Keap1-Nrf2 Pathway during  
606 Selective Autophagy. *Molecular Cell* **51**, 618-631.
- 607 **Itoh, K., Mimura, J. and Yamamoto, M.** (2010). Discovery of the Negative Regulator of Nrf2,  
608 Keap1: A Historical Overview. *Antioxidants & Redox Signaling* **13**, 1665-1678.
- 609 **Itoh, K., Wakabayashi, N., Katoh, Y., Ishii, T., Igarashi, K., Engel, J. D. and Yamamoto, M.**  
610 (1999). Keap1 represses nuclear activation of antioxidant responsive elements by Nrf2 through binding  
611 to the amino-terminal Neh2 domain. *Genes & Development* **13**, 76-86.
- 612 **Joo, M. S., Kim, W. D., Lee, K. Y., Kim, J. H., Koo, J. H. and Kim, S. G.** (2016). AMPK Facilitates  
613 Nuclear Accumulation of Nrf2 by Phosphorylating at Serine 550. *Mol Cell Biol* **36**, 1931-42.
- 614 **Kensler, T. W., Wakabayashi, N. and Biswal, S.** (2007). Cell Survival Responses to Environmental  
615 Stresses Via the Keap1-Nrf2-ARE Pathway. *Annual Review of Pharmacology and Toxicology* **47**, 89-116.
- 616 **Kim, J. S., Hung, W., Narbonne, P., Roy, R. and Zhen, M.** (2010). C. elegans STRADalpha and SAD  
617 cooperatively regulate neuronal polarity and synaptic organization. *Development* **137**, 93-102.



618 **Kishi, M. P., YA; Crump, JG; Sanes, JR.** (2005). Mammalian SAD kinases are required for  
619 neuronal polarization. *Science*.

620 **Komar, A. A. and Hatzoglou, M.** (2011). Cellular IRES-mediated translation: the war of ITAFs in  
621 pathophysiological states. *Cell Cycle* **10**, 229-40.

622 **Krug, K., Mertins, P., Zhang, B., Hornbeck, P., Raju, R., Ahmad, R., Szucs, M., Mundt, F.,**  
623 **Forestier, D., Jane-Valbuena, J. et al.** (2019). A Curated Resource for Phosphosite-specific Signature  
624 Analysis. *Mol Cell Proteomics* **18**, 576-593.

625 **Lau, A., Wang, X.-J., Zhao, F., Villeneuve, N. F., Wu, T., Jiang, T., Sun, Z., White, E. and Zhang,**  
626 **D. D.** (2010). A noncanonical mechanism of Nrf2 activation by autophagy deficiency: direct interaction  
627 between Keap1 and p62. *Molecular and Cellular Biology* **30**, 3275-3285.

628 **Law, C. W., Alhamdoosh, M., Su, S., Dong, X., Tian, L., Smyth, G. K. and Ritchie, M. E.** (2016).  
629 RNA-seq analysis is easy as 1-2-3 with limma, Glimma and edgeR. *F1000Res* **5**.

630 **Lee, S. C., Zhang, J., Strom, J., Yang, D., Dinh, T. N., Kappeler, K. and Chen, Q. M.** (2017). G-  
631 Quadruplex in the NRF2 mRNA 5' Untranslated Region Regulates De Novo NRF2 Protein Translation  
632 under Oxidative Stress. *Mol Cell Biol* **37**.

633 **Lenarcic, E. M., Ziehr, B., De Leon, G., Mitchell, D. and Moorman, N. J.** (2014). Differential role  
634 for host translation factors in host and viral protein synthesis during human cytomegalovirus infection. *J*  
635 *Virology* **88**, 1473-83.

636 **Li, R., Wan, B., Zhou, J., Wang, Y., Luo, T., Gu, X., Chen, F. and Yu, L.** (2012). APC/CCdh1 Targets  
637 Brain-Specific Kinase 2 (BRSK2) for Degradation via the Ubiquitin-Proteasome Pathway. *PLoS ONE* **7**,  
638 e45932.

639 **Liberzon, A., Birger, C., Thorvaldsdottir, H., Ghandi, M., Mesirov, J. P. and Tamayo, P.** (2015).  
640 The Molecular Signatures Database (MSigDB) hallmark gene set collection. *Cell Syst* **1**, 417-425.

641 **Lilley, B. N., Krishnaswamy, A., Wang, Z., Kishi, M., Frank, E. and Sanes, J. R.** (2014). SAD  
642 kinases control the maturation of nerve terminals in the mammalian peripheral and central nervous  
643 systems. *Proc Natl Acad Sci U S A* **111**, 1138-43.

644 **Lim, J. H., Kim, K.-M., Kim, S. W., Hwang, O. and Choi, H. J.** (2008). Bromocriptine activates  
645 NQO1 via Nrf2-PI3K/Akt signaling: Novel cytoprotective mechanism against oxidative damage.  
646 *Pharmacological Research* **57**, 325-331.

647 **Lizcano, J. M., Goransson, O., Toth, R., Deak, M., Morrice, N. A., Boudeau, J., Hawley, S. A.,**  
648 **Udd, L., Makela, T. P., Hardie, D. G. et al.** (2004). LKB1 is a master kinase that activates 13 kinases of the  
649 AMPK subfamily, including MARK/PAR-1. *EMBO J* **23**, 833-43.

650 **Matthew P. Walker, C. M. S., Maria Cederlund, Fang Fang, Christopher Jahn, Alex D.**  
651 **Rabinowitz, Dennis Goldfarb, David M. Graham, Feng Yan, Allison M. Deal, Yuri Fedoriw, Kristy L.**  
652 **Richards, Ian J. Davis, Gilbert Weidinger, Blossom Damania, Michael B. Major.** (2015). FOXP1  
653 potentiates Wnt/b-catenin signaling in diffuse large B cell lymphoma. *Science Signaling*.

654 **Menegon, S., Columbano, A. and Giordano, S.** (2016). The Dual Roles of NRF2 in Cancer. *Trends*  
655 *in Molecular Medicine*.

656 **Michaeloudes, C., Mercado, N., Clarke, C., Bhavsar, P. K., Adcock, I. M., Barnes, P. J. and**  
657 **Chung, K. F.** (2014). Bromodomain and Extraterminal Proteins Suppress NF-E2-Related Factor 2-  
658 Mediated Antioxidant Gene Expression. *The Journal of Immunology* **192**, 4913-4920.

659 **Moehlenkamp, J. D. and Johnson, J. A.** (1999). Activation of antioxidant/electrophile-responsive  
660 elements in IMR-32 human neuroblastoma cells. *Archives of biochemistry and biophysics* **363**, 98-106.

661 **Morrison, L. M., Edwards, S. L., Manning, L., Stec, N., Richmond, J. E. and Miller, K. G.** (2018).  
662 Stryn and SAD Kinase Link the Guided Transport and Capture of Dense Core Vesicles in *Caenorhabditis*  
663 *elegans*. *Genetics* **210**, 925-946.

664 **Muller, M., Lutter, D. and Puschel, A. W.** (2010). Persistence of the cell-cycle checkpoint kinase  
665 Wee1 in SadA- and SadB-deficient neurons disrupts neuronal polarity. *J Cell Sci* **123**, 286-94.



- 666           **Naidu, S., Vijayan, V., Santoso, S., Kietzmann, T. and Immenschuh, S.** (2009). Inhibition and  
667 genetic deficiency of p38 MAPK up-regulates heme oxygenase-1 gene expression via Nrf2. *Journal of*  
668 *immunology (Baltimore, Md. : 1950)* **182**, 7048-7057.
- 669           **Nakaso, K., Yano, H., Fukuhara, Y., Takeshima, T., Wada-Isoe, K. and Nakashima, K.** (2003).  
670 PI3K is a key molecule in the Nrf2-mediated regulation of antioxidative proteins by hemin in human  
671 neuroblastoma cells. *FEBS Letters* **546**, 181-184.
- 672           **Nie, J., Sun, C., Chang, Z., Musi, N. and Shi, Y.** (2018). SAD-A Promotes Glucose-Stimulated  
673 Insulin Secretion Through Phosphorylation and Inhibition of GDIalpha in Male Islet beta Cells.  
674 *Endocrinology* **159**, 3036-3047.
- 675           **Nie, J., Sun, C., Faruque, O., Ye, G., Li, J., Liang, Q., Chang, Z., Yang, W., Han, X. and Shi, Y.**  
676 (2012). Synapses of amphids defective (SAD-A) kinase promotes glucose-stimulated insulin secretion  
677 through activation of p21-activated kinase (PAK1) in pancreatic beta-Cells. *J Biol Chem* **287**, 26435-44.
- 678           **Ritchie, M. E., Phipson, B., Wu, D., Hu, Y., Law, C. W., Shi, W. and Smyth, G. K.** (2015). limma  
679 powers differential expression analyses for RNA-sequencing and microarray studies. *Nucleic Acids Res*  
680 **43**, e47.
- 681           **Rojo de la Vega, M., Chapman, E. and Zhang, D. D.** (2018). NRF2 and the Hallmarks of Cancer.  
682 *Cancer Cell* **34**, 21-43.
- 683           **Saiyin, H. N., N; Han, X; Fang, Y; Wu, Y; Lou, W; Yang, X.** (2017). BRSK2 induced by nutrient  
684 deprivation promotes Akt activity in pancreatic cancer via downregulation of mTOR activity. *Oncotarget*.  
685           **Satoh, H., Moriguchi, T., Takai, J., Ebina, M. and Yamamoto, M.** (2013). Nrf2 Prevents Initiation  
686 but Accelerates Progression through the Kras Signaling Pathway during Lung Carcinogenesis. *Cancer*  
687 *Research* **73**, 4158-4168.
- 688           **Saxena, M. T., Schroeter, E. H., Mumm, J. S. and Kopan, R.** (2001). Murine notch homologs (N1-  
689 4) undergo presenilin-dependent proteolysis. *J Biol Chem* **276**, 40268-73.
- 690           **Shen, G., Hebbar, V., Nair, S., Xu, C., Li, W., Lin, W., Keum, Y.-S., Han, J., Gallo, M. A. and Kong,**  
691 **A.-N. T.** (2004). Regulation of Nrf2 transactivation domain activity. The differential effects of mitogen-  
692 activated protein kinase cascades and synergistic stimulatory effect of Raf and CREB-binding protein.  
693 *The Journal of biological chemistry* **279**, 23052-23060.
- 694           **Subramanian, A. T., Pablo; Mootha, Vamsi K.; Mukherjee, Sayan; Ebert, Benjamin L.; Gillette,**  
695 **Michael A.; Paulovich, Amanda; Pomeroy, Scott L.; Golub, Todd R.; Lander, Eric S.; Mesirov, Jill P.**  
696 (2005). Gene set enrichment analysis: A knowledge-based approach for interpreting genome-wide  
697 expression profiles. *Proceedings of the National Academy of Sciences*.
- 698           **Sun, Z., Huang, Z. and Zhang, D. D.** (2009). Phosphorylation of Nrf2 at multiple sites by MAP  
699 kinases has a limited contribution in modulating the Nrf2-dependent antioxidant response. *PLoS ONE* **4**,  
700 e6588.
- 701           **Suzuki, T., Muramatsu, A., Saito, R., Iso, T., Shibata, T., Kuwata, K., Kawaguchi, S. I., Iwawaki,**  
702 **T., Adachi, S., Suda, H. et al.** (2019). Molecular Mechanism of Cellular Oxidative Stress Sensing by Keap1.  
703 *Cell Rep* **28**, 746-758 e4.
- 704           **Suzuki, T. and Yamamoto, M.** (2015). Molecular basis of the Keap1–Nrf2 system. *Free Radical*  
705 *Biology and Medicine* **88**, 93-100.
- 706           **Tamir, T. Y., Mulvaney, K. M. and Major, M. B.** (2016). Dissecting the Keap1/Nrf2 pathway  
707 through proteomics. *Current Opinion in Toxicology* **1**, 118-124.
- 708           **Tao, S., Wang, S., Moghaddam, S. J., Ooi, A., Chapman, E., Wong, P. K. and Zhang, D. D.** (2014).  
709 Oncogenic KRAS Confers Chemoresistance by Upregulating NRF2. *Cancer Research* **74**, 7430-7441.
- 710           **Tong, K. I., Katoh, Y., Kusunoki, H., Itoh, K., Tanaka, T. and Yamamoto, M.** (2006). Keap1  
711 Recruits Neh2 through Binding to ETGE and DLG Motifs: Characterization of the Two-Site Molecular  
712 Recognition Model. *Molecular and Cellular Biology* **26**, 2887-2900.

- 713 **Torrente, L., Sanchez, C., Moreno, R., Chowdhry, S., Cabello, P., Isono, K., Koseki, H., Honda, T.,**  
714 **Hayes, J. D., Dinkova-Kostova, A. T. et al.** (2017). Crosstalk between NRF2 and HIPK2 shapes  
715 cytoprotective responses. *Oncogene* **36**, 6204-6212.
- 716 **Travis L. Biechele, R. T. M.** (2008). Assaying b-Catenin/TCF Transcription with b-Catenin/TCF  
717 Transcription-Based Reporter Constructs. In *Methods in Molecular Biology*, (ed. E. Vincan).
- 718 **Tsakiri, E. N., Gumeni, S., Iliaki, K. K., Benaki, D., Vougas, K., Sykiotis, G. P., Gorgoulis, V. G.,**  
719 **Mikros, E., Scorrano, L. and Trougakos, I. P.** (2019). Hyperactivation of Nrf2 increases stress tolerance at  
720 the cost of aging acceleration due to metabolic deregulation. *Aging Cell* **18**, e12845.
- 721 **Tsuchida, K., Tsujita, T., Hayashi, M., Ojima, A., Keleku-Lukwete, N., Katsuoka, F., Otsuki, A.,**  
722 **Kikuchi, H., Oshima, Y., Suzuki, M. et al.** (2017). Halofuginone enhances the chemo-sensitivity of cancer  
723 cells by suppressing NRF2 accumulation. *Free Radic Biol Med* **103**, 236-247.
- 724 **Uhlen, M., Fagerberg, L., Hallstrom, B. M., Lindskog, C., Oksvold, P., Mardinoglu, A.,**  
725 **Sivertsson, A., Kampf, C., Sjostedt, E., Asplund, A. et al.** (2015). Proteomics. Tissue-based map of the  
726 human proteome. *Science* **347**, 1260419.
- 727 **Uhlen, M., Oksvold, P., Fagerberg, L., Lundberg, E., Jonasson, K., Forsberg, M., Zwahlen, M.,**  
728 **Kampf, C., Wester, K., Hober, S. et al.** (2010). Towards a knowledge-based Human Protein Atlas. *Nat*  
729 *Biotechnol* **28**, 1248-50.
- 730 **Vizcaino, J. A., Deutsch, E. W., Wang, R., Csordas, A., Reisinger, F., Rios, D., Dianes, J. A., Sun,**  
731 **Z., Farrah, T., Bandeira, N. et al.** (2014). ProteomeXchange provides globally coordinated proteomics  
732 data submission and dissemination. *Nat Biotechnol* **32**, 223-6.
- 733 **Wakabayashi, N., Itoh, K., Wakabayashi, J., Motohashi, H., Noda, S., Takahashi, S., Imakado,**  
734 **S., Kotsuji, T., Otsuka, F., Roop, D. R. et al.** (2003). Keap1-null mutation leads to postnatal lethality due  
735 to constitutive Nrf2 activation. *Nat Genet* **35**, 238-45.
- 736 **Wang, P., Geng, J., Gao, J., Zhao, H., Li, J., Shi, Y., Yang, B., Xiao, C., Linghu, Y., Sun, X. et al.**  
737 (2019). Macrophage achieves self-protection against oxidative stress-induced ageing through the Mst-  
738 Nrf2 axis. *Nat Commun* **10**, 755.
- 739 **Wang, Y., Wan, B., Li, D., Zhou, J., Li, R., Bai, M., Chen, F. and Yu, L.** (2012). BRSK2 is regulated  
740 by ER stress in protein level and involved in ER stress-induced apoptosis. *Biochemical and Biophysical*  
741 *Research Communications* **423**, 813-818.
- 742 **Wang, Y., Wan, B., Zhou, J., Li, R. and Yu, L.** (2013). BRSK2 is a valosin-containing protein (VCP)-  
743 interacting protein that affects VCP functioning in endoplasmic reticulum-associated degradation.  
744 *Biotechnology Letters* **35**, 1983-1989.
- 745 **Wang, Y. L., Wang, J., Chen, X., Wang, Z. X. and Wu, J. W.** (2018). Crystal structure of the kinase  
746 and UBA domains of SNRK reveals a distinct UBA binding mode in the AMPK family. *Biochem Biophys Res*  
747 *Commun* **495**, 1-6.
- 748 **Warfel, N. A., Sainz, A. G., Song, J. H. and Kraft, A. S.** (2016). PIM Kinase Inhibitors Kill Hypoxic  
749 Tumor Cells by Reducing Nrf2 Signaling and Increasing Reactive Oxygen Species. *Mol Cancer Ther* **15**,  
750 1637-47.
- 751 **Wu, J. X., Cheng, Y. S., Wang, J., Chen, L., Ding, M. and Wu, J. W.** (2015). Structural insight into  
752 the mechanism of synergistic autoinhibition of SAD kinases. *Nat Commun* **6**, 8953.
- 753 **Zhang, H., Davies, K. J. A. and Forman, H. J.** (2015). Oxidative stress response and Nrf2 signaling  
754 in aging. *Free Radical Biology and Medicine* **88**, 314-336.

Figure 1

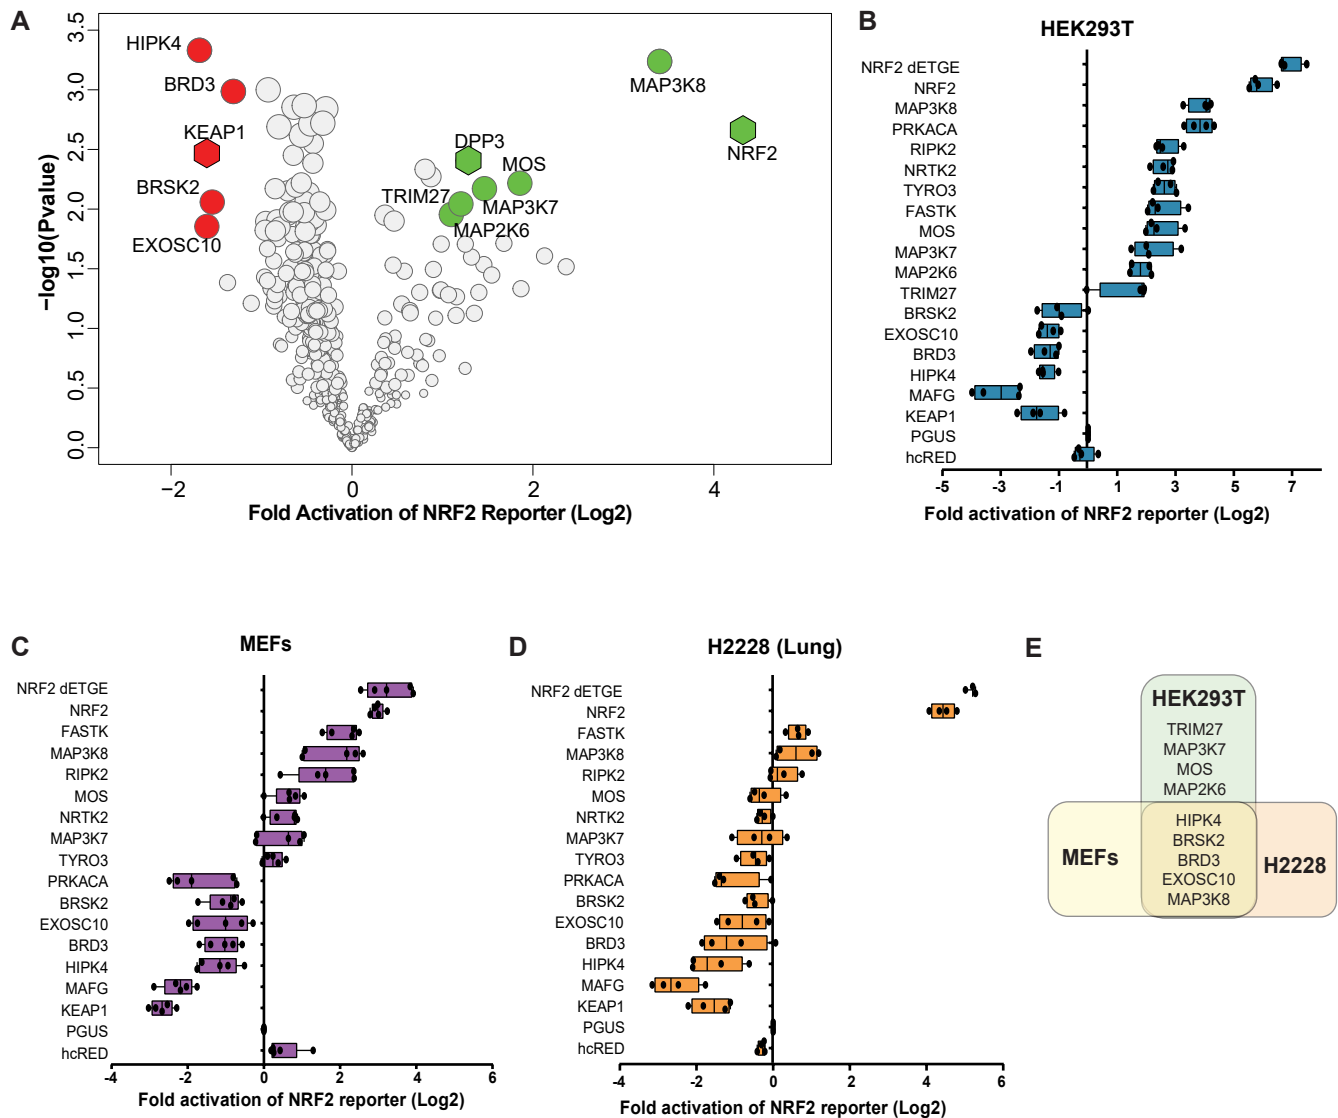

**Figure 1. A gain-of-function screen identifies kinases that regulate NRF2-dependent transcription. (A)** Volcano plot representation of kinase over-expression screen of NRF2-driven hQR41-firefly luciferase reporter in HEK293T cells. The experiment was performed in biological triplicate and 6 technical replicates. NRF2 transcriptional activity was determined by measuring levels of hQR41-firefly luciferase normalized to TK-*Renilla* luciferase. Data are plotted relative to GFP over-expression control. Significance was measured with Student T-test including correction for multiple comparison using Benjamini & Hochberg method. Colored circles indicate candidate kinases that passed false discovery rate of less than 10%. NRF2, KEAP1 and DPP3 serve as positive controls. **(B-D)** hQR41 reporter validation study for the indicated kinase in HEK293T cells, MEFs and H2228 cells, respectively. **(E)** Venn diagram of validated kinase hits in HEK293T, H2228 and MEFs.

Figure 2

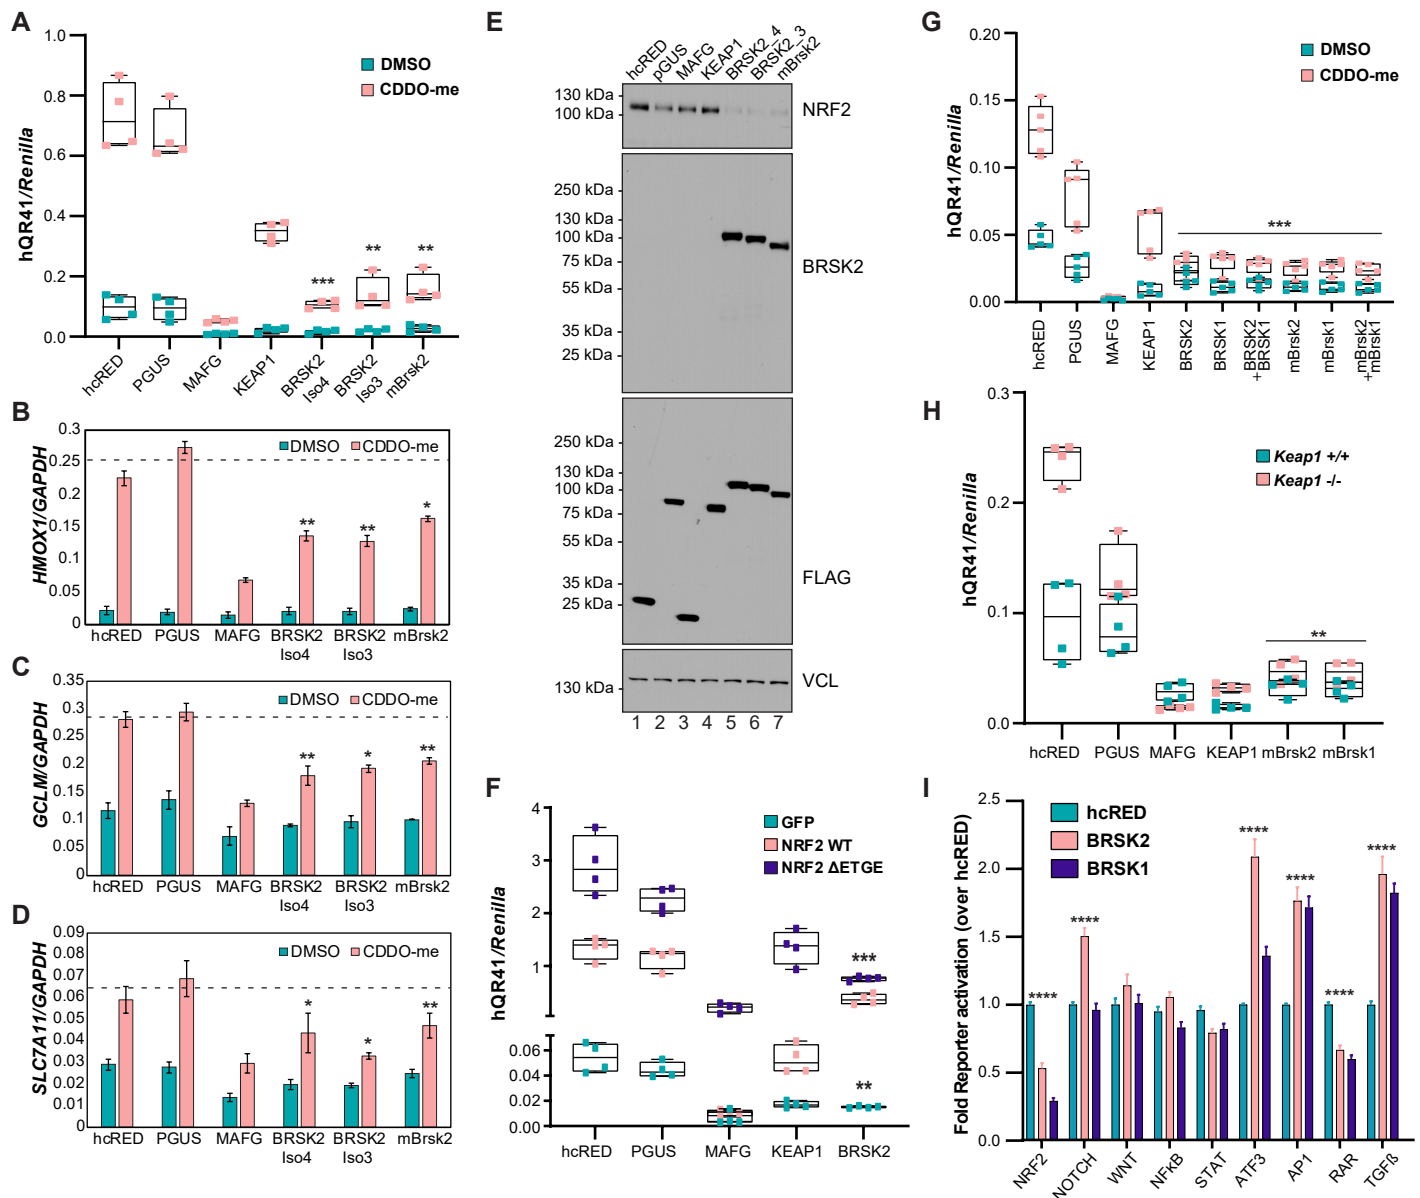

**Figure 2. BRK2 and BRK1 inhibit NRF2-mediated transcription. (A)** hQR41-luciferase assay in HEK293T cells following expression of control (hcRED, PGUS), positive control (MAFG, KEAP1) or BRK2 splice variants (BRSK2iso4, BRISK2 iso3) or mouse Brsk2. Cells were treated with vehicle control or CDDO-me (100nM, 12hrs). **(B-D)** BRK2 over-expression inhibits endogenous NRF2 target genes (*HMOX1*, *GCLM*, and *SLC7A11*) induction in HEK293T cells (representative of N = 3). **(E)** Western blot of HEK293T cells 24h after transfection with the indicated expression plasmid. Cells were treated with CDDO-me 12h before lysis. **(F)** hQR41-luciferase reporter assay in HEK293T cells expressing the indicated plasmid combination for 24h. **(G)** hQR41-luciferase reporter assay in HEK293T cells expressing the indicated plasmid. Cells were treated with CDDO-me 12h before lysis. **(H)** hQR41 reporter assay in wild type MEFs and KEAP1<sup>-/-</sup> MEFs expressing the indicated plasmids. **(I)** HEK293T cells were transiently transfected with the indicated firefly transcriptional reporter, *Renilla* luciferase, hcRED, BRSK2 or BRSK1. Two-tailed Student's t-test was performed comparing BRSK2 or BRSK1 to hcRED control, and statistical significance was assigned as follows: \* p < 0.05, \*\* p < 0.01, \*\*\* p < 0.001, \*\*\*\* p < 0.0001.

Figure 3

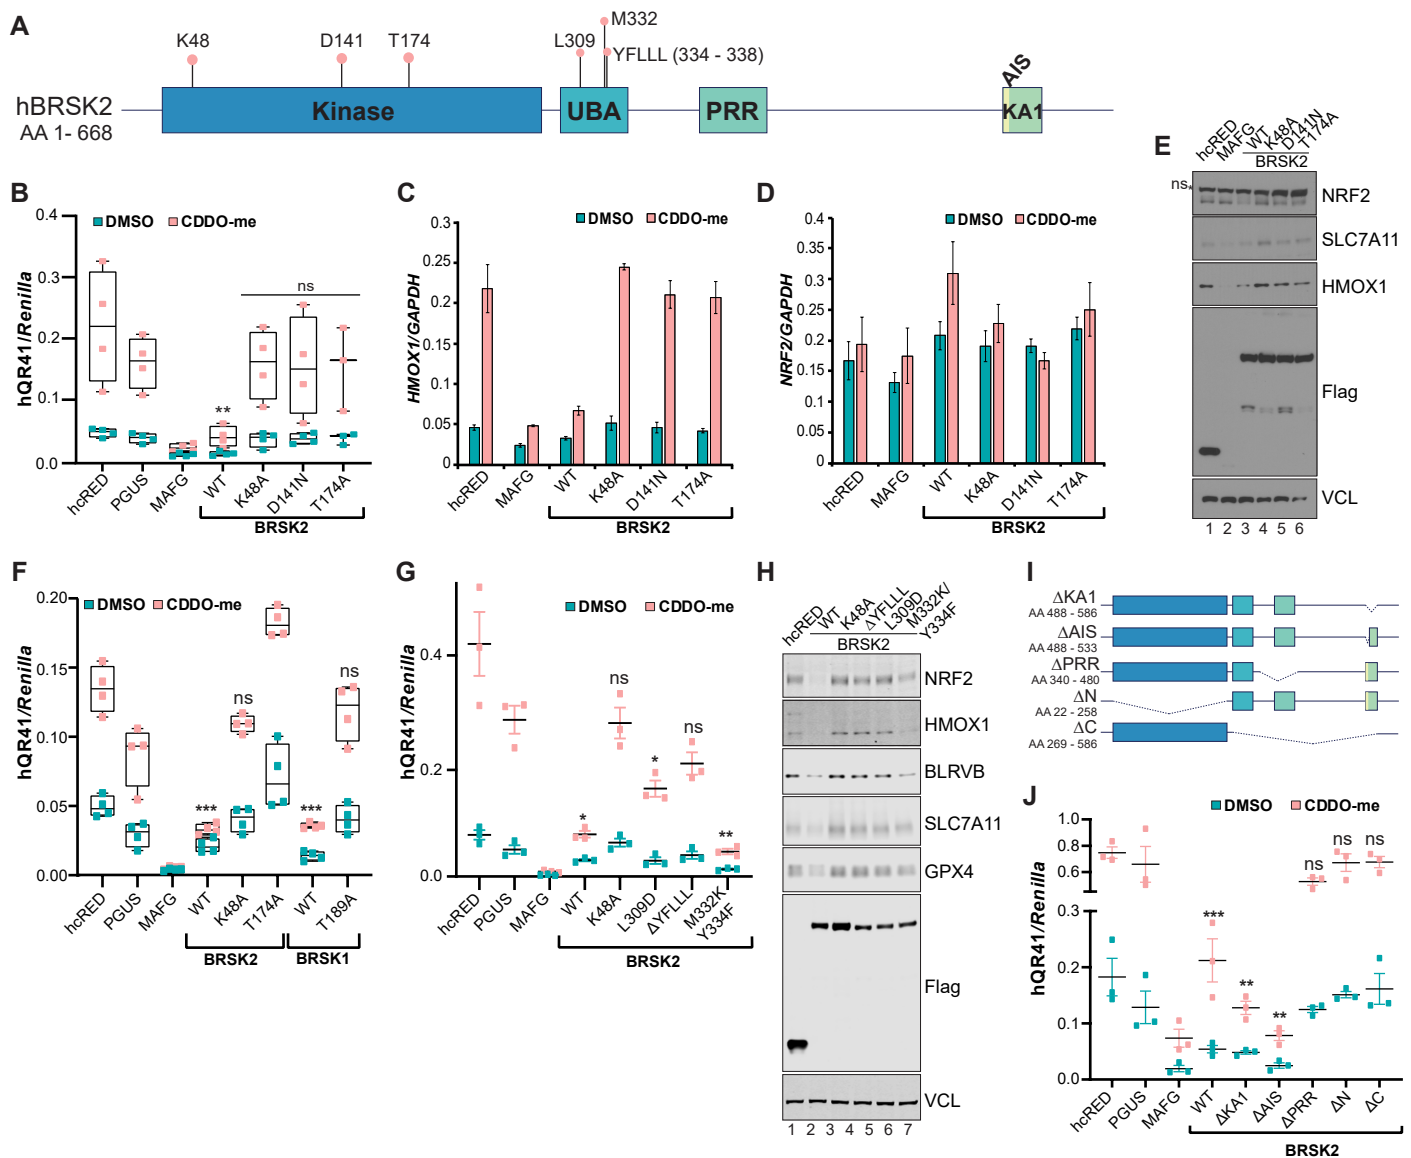

**Figure 3. BRSK1 and BRSK2 kinase activity is required for suppression of NRF2-dependent transcription.** (A) Cartoon schematic of BRSK2 protein showing residues and domains important for kinase activity. (B) hQR41 reporter assay in HEK293T cells expressing the indicated construct; cells were treated with vehicle or CDDO-me for 12h prior to luciferase quantitation. (C,D). Quantitative RT-PCR for *HMOX1* and *NRF2* in HEK293T cells following over-expression of the indicated genes (representative of N = 3). (E) Western blot analysis of HEK293T cells expressing the indicated plasmids. Cells were treated with CDDO-me for 4h before lysis. ns = nonspecific. (F) hQR41 luciferase assay in HEK293T cells expressing the indicated proteins. (G) Western blot analysis of HEK293T cells expressing the indicated plasmids. Cells were treated with CDDO-me for 4h before lysis. (H) Cartoon schematic of BRSK2 deletions. (I,J) hQR41 reporter assay in HEK293T cells expressing the indicated construct; cells were treated with vehicle or CDDO-me for 12h prior to luciferase quantitation. Two-tailed Student's t-test was performed comparing corresponding hcRED control with treatment groups and statistical significance was assigned: \* p < 0.05, \*\* p < 0.01, \*\*\* p < 0.001, ns = not statistically significant.

Figure 4

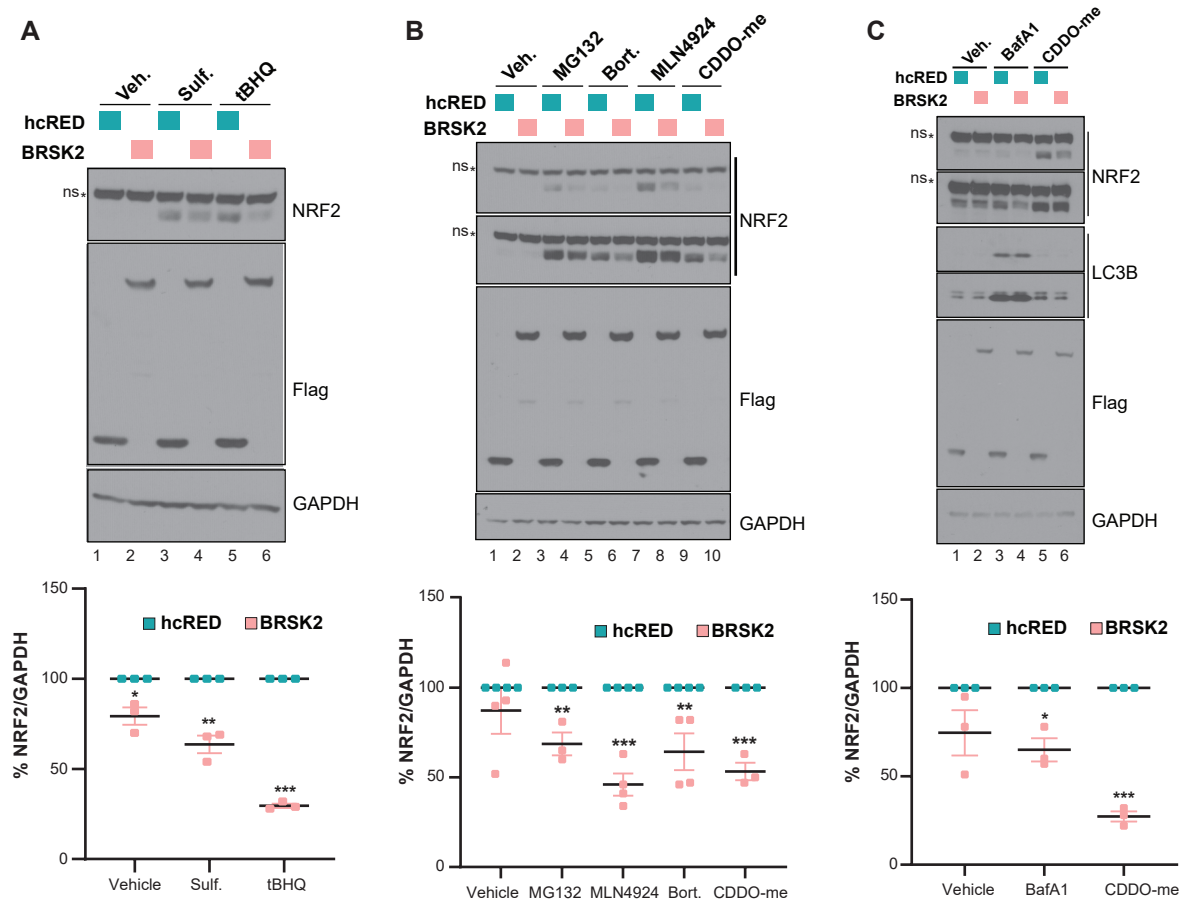

**Figure 4. BRSK2-mediated NRF2 downregulation is independent of the NRF2 ubiquitylation and degradation. (A)** HEK293T cells were transfected with control hcRED or BRSK2 for 24h before treatment with vehicle (veh) or Sulforaphane (Sulf., 2 $\mu$ M) or tert-Butylhydroquinone (tBHQ, 50 $\mu$ M) for 4h. Quantitation of biological triplicate experiments is shown in the lower panel, normalized to GAPDH. **(B, C)** HEK293T cells were transfected with control hcRED or BRSK2 for 24h before treatment with MG132 [10 $\mu$ M], Bortezomab (Bort., [40nM]), MLN4924 [2.5 $\mu$ M], Bafilomycin A1 (BafA1, [200nM]). All treatments were for 4h, except for BafA1 which was 12h. Two-tailed Student's t-test was performed comparing hcRED with BRSK2, and statistical significance was assigned as follows: \* p < 0.05, \*\* p < 0.01, \*\*\* p < 0.001.





Figure 6

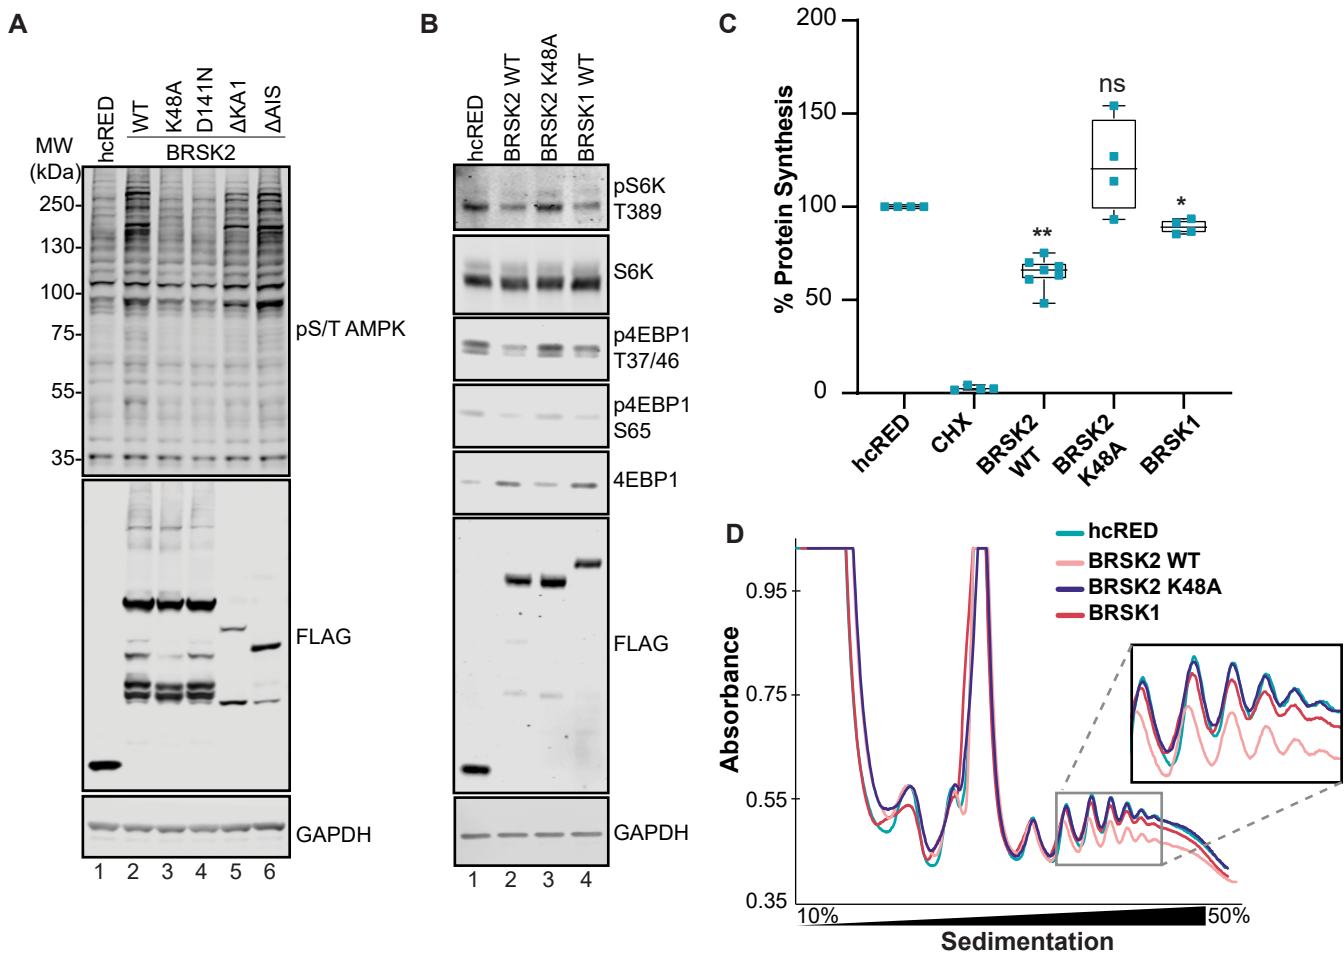

**Figure 6. BRSK2 suppresses protein translation.** **(A)** Western blot analysis AMPK consensus phosphorylation sites in HEK293T cells transfected with hcRED, BRSK2, or the indicated BRSK2 mutants (representative of N = 3). **(B)** Western blot analysis of BRSK1 and BRSK2 expression in HEK293T cells for MTOR targets S6K (T389) and 4EBP1 (T37/46 and S65) which increases 4EBP1 stability (representative of N = 3). **(C)** Global protein translation assay performed using <sup>35</sup>S-Metionine labeling in cells expressing hcRed (control), BRSK2, BRSK2 K48A, or BRSK1. Two-tailed Student's t-test was performed comparing hcRED to other conditions, and statistical significance was assigned as follows: \* p < 0.05, \*\* p < 0.01, \*\*\* p < 0.001. **(D)** Polyribosome fraction of HEK293T cells overexpressing hcRED control, BRSK2, BRSK2 K48A, or BRSK1 performed on 50% - 10% sucrose gradient. Experiments represent biological triplicates, unless indicated otherwise.

## Supplemental Figure S1

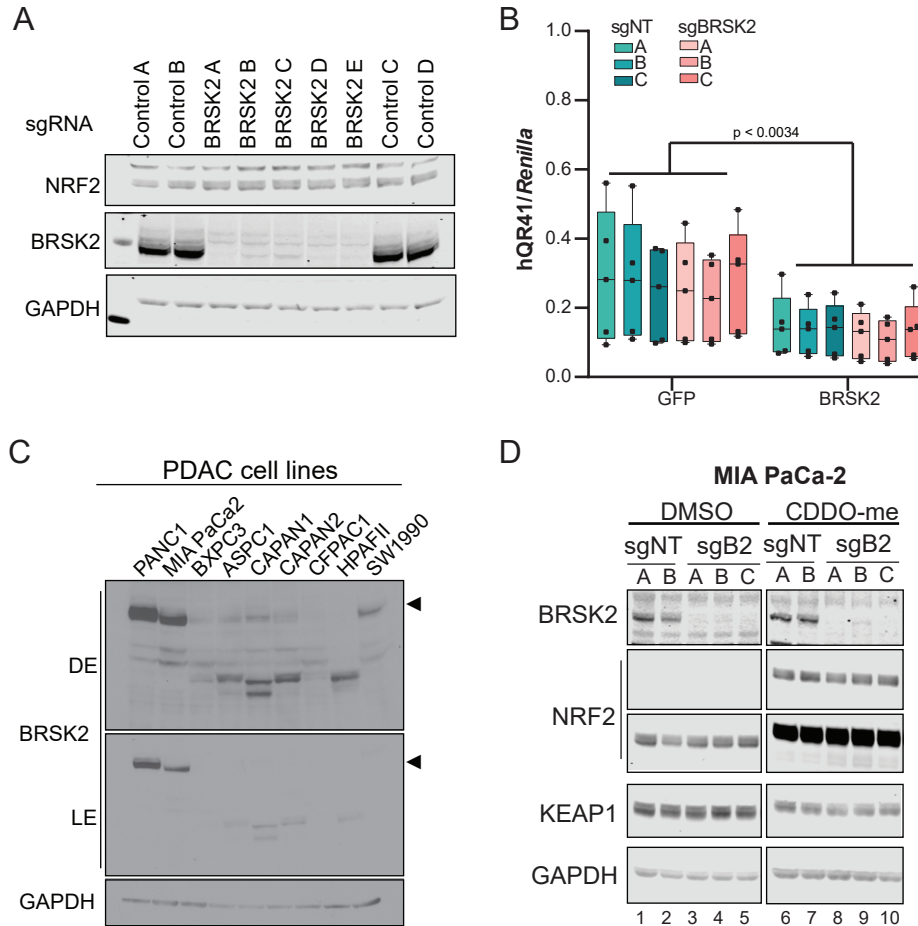

**Supplemental Figure S1. BRSK2 CRISPRi silencing does not alter NRF2 protein levels.** (A) HEK293T cells stably expressing KRAB-dCas9 and 4 control or 5 BRSK2 sgRNAs. BRSK2 knockdown does not alter NRF2 protein levels. (B) hQR41 reporter assay in CRISPRi silenced cells with GFP or BRSK2 over-expression shows that BRSK2 knockdown does not affect NRF2 activity. (C) BRSK2 expression levels in pancreatic ductal adenocarcinoma (PDAC) cell lines. (D) CRISPRi silencing of BRSK2 in MIA PaCa2 cells treated with DMSO or CDDO-me for 4hrs. Neither NRF2 nor KEAP1 levels were altered by loss of BRSK2 protein.

## Supplemental Figure S2

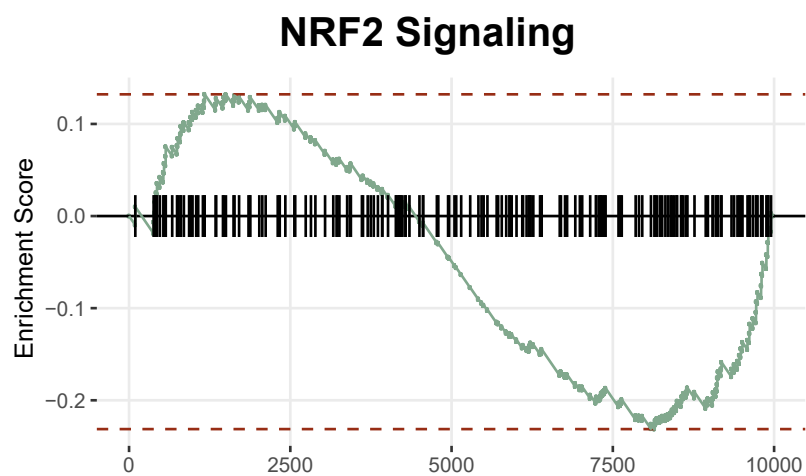

**Supplemental Figure S2. BRSK2 overexpression decreased NRF2 target gene signature.**
